# Supplementary material
Source: PubMed Central journal article supplement (PMC7191725)
Supplement: 12864_2020_6745_MOESM1_ESM.pdf [file 12864_2020_6745_MOESM1_ESM.pdf]

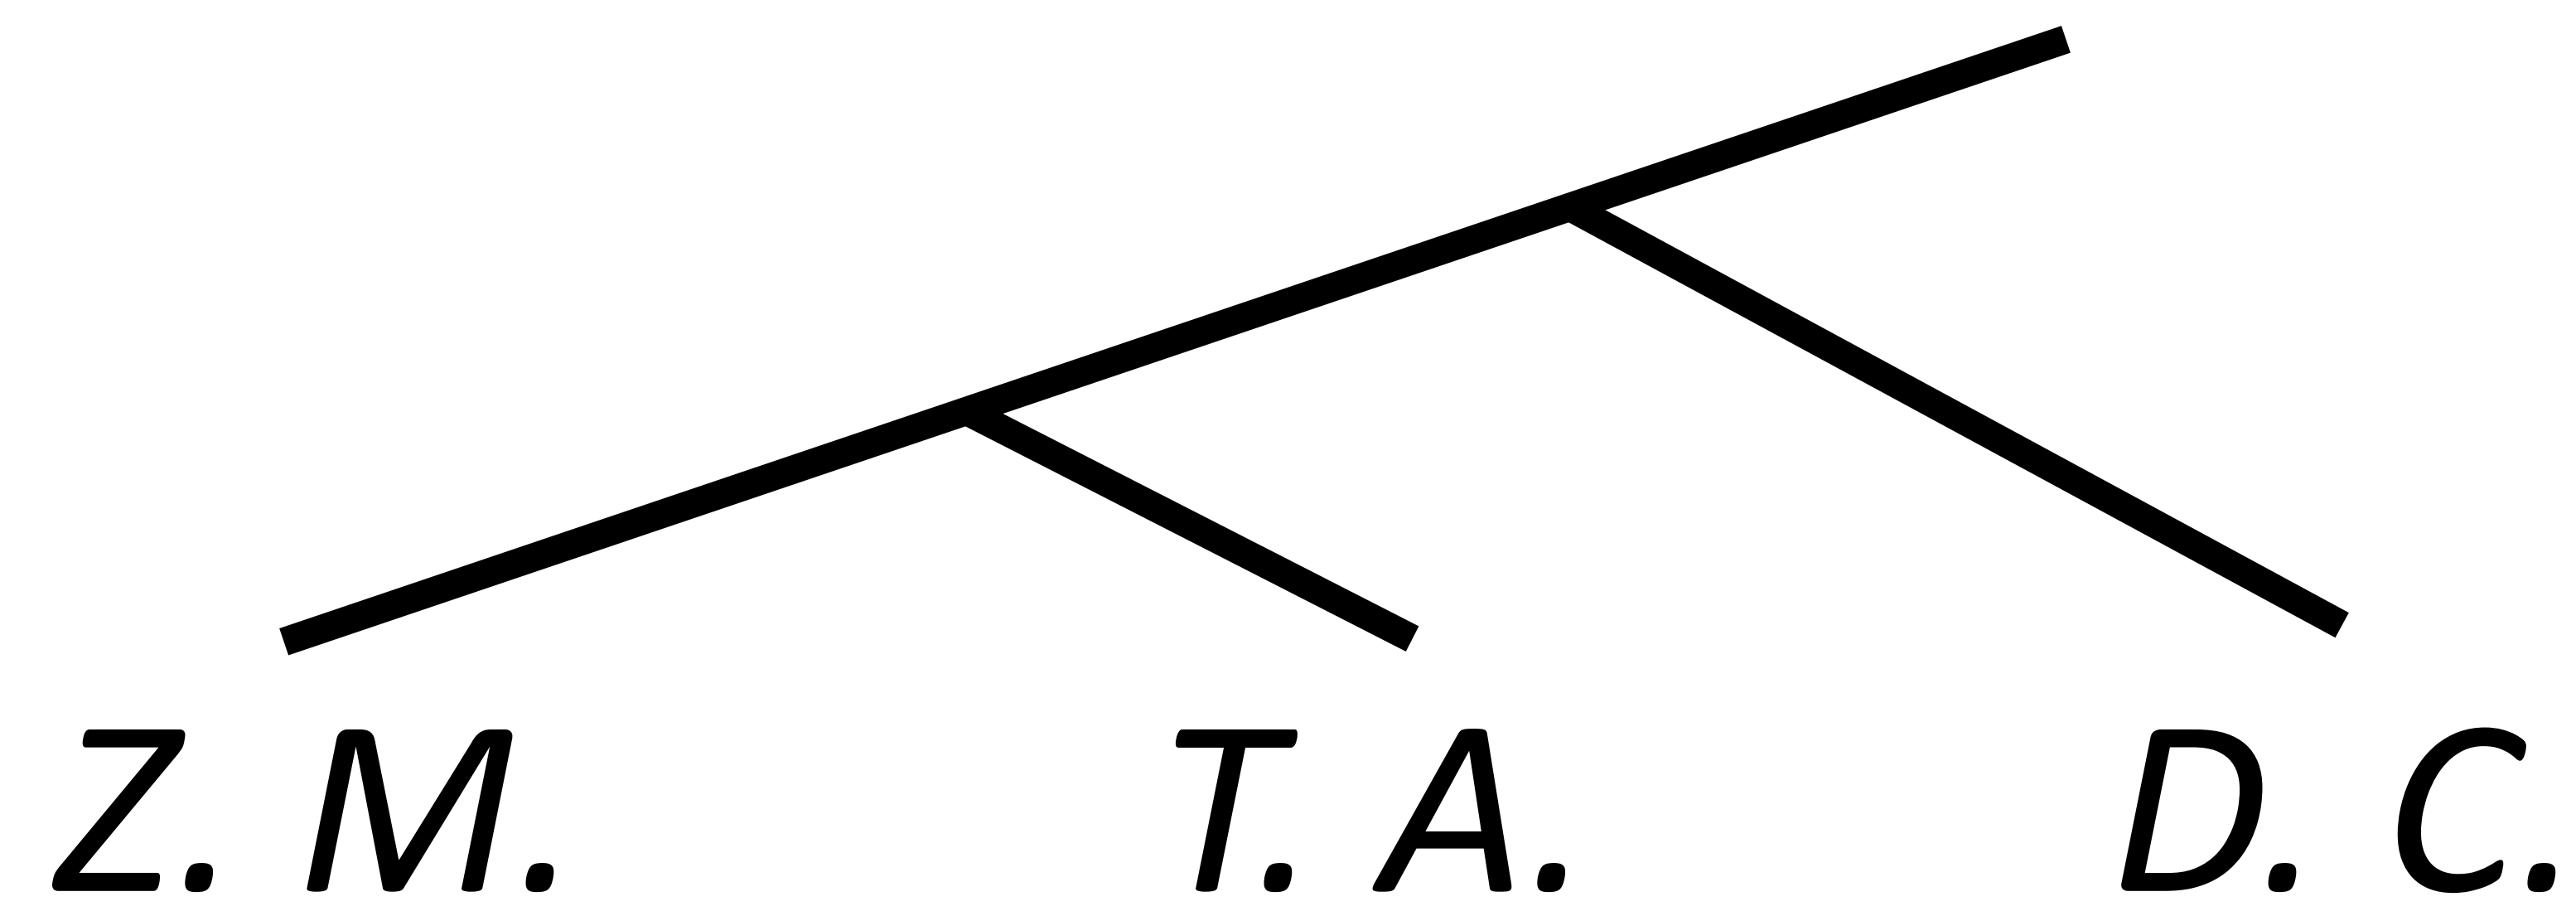

*Z.M. : Zea mays.*

*T.A. : Triticum aestivum.*

*D.C. : Daucus carota.*

**ref. RNA-seq**

Mutation type in *Z.M.*

|   |     |    |    |
|---|-----|----|----|
| C | C,A | C  | C  |
| C | C,T | C  | C  |
| C | C   | A  | A  |
| C | C   | T  | T  |
| C | C,A | A  | C  |
| C | C   | T  | C  |
| C | C,A | NA | C  |
| C | C   | C  | NA |

polymorphic

fixed

discarded

NA = not available (indel/gap or unaligned)

Figure S1

| Species                  | CDS sequence                                                                    | RNA-seq data                                            |
|--------------------------|---------------------------------------------------------------------------------|---------------------------------------------------------|
| <i>Zea mays</i>          | ftp://ftp.ensemblgenomes.org/pub/release-43/plants/fasta/zea_mays/cds/          | SRR7403478-<br>SRR7403480,<br>SRR7403485-<br>SRR7403487 |
| <i>Triticum aestivum</i> | ftp://ftp.ensemblgenomes.org/pub/release-43/plants/fasta/triticum_aestivum/cds/ | SRR8767835,<br>SRR8767837                               |
| <i>Daucus carota</i>     | ftp://ftp.ensemblgenomes.org/pub/release-43/plants/fasta/daucus_carota/cds/     | SRR7641984-<br>SRR7641993                               |

| Species         | Number of unique genes | Number of unique codons |
|-----------------|------------------------|-------------------------|
| <i>Zea mays</i> | 39254                  | 13958446                |

Number of mutations detected in the whole CDS regions

| Type        | Total  | Synonymous | Non-synonymous | Nonsense |
|-------------|--------|------------|----------------|----------|
| Fixed       | 843285 | 437056     | 400943         | 5286     |
| Polymorphic | 12041  | 4865       | 6875           | 301      |

Figure S2

Fixed/polymorphic ratio of mutations detected in the whole CDS regions

| Type                   | Synonymous |          | Non-synonymous | Nonsense |
|------------------------|------------|----------|----------------|----------|
|                        | tAI up     | tAI down |                |          |
| Highly expressed genes | 127.2      | 60.3     | 52.9           | 14.5     |
| Lowly expressed genes  | 101.6      | 72.8     | 61.4           | 19.3     |

Figure S3

# Frequency spectrum of the polymorphic mutations

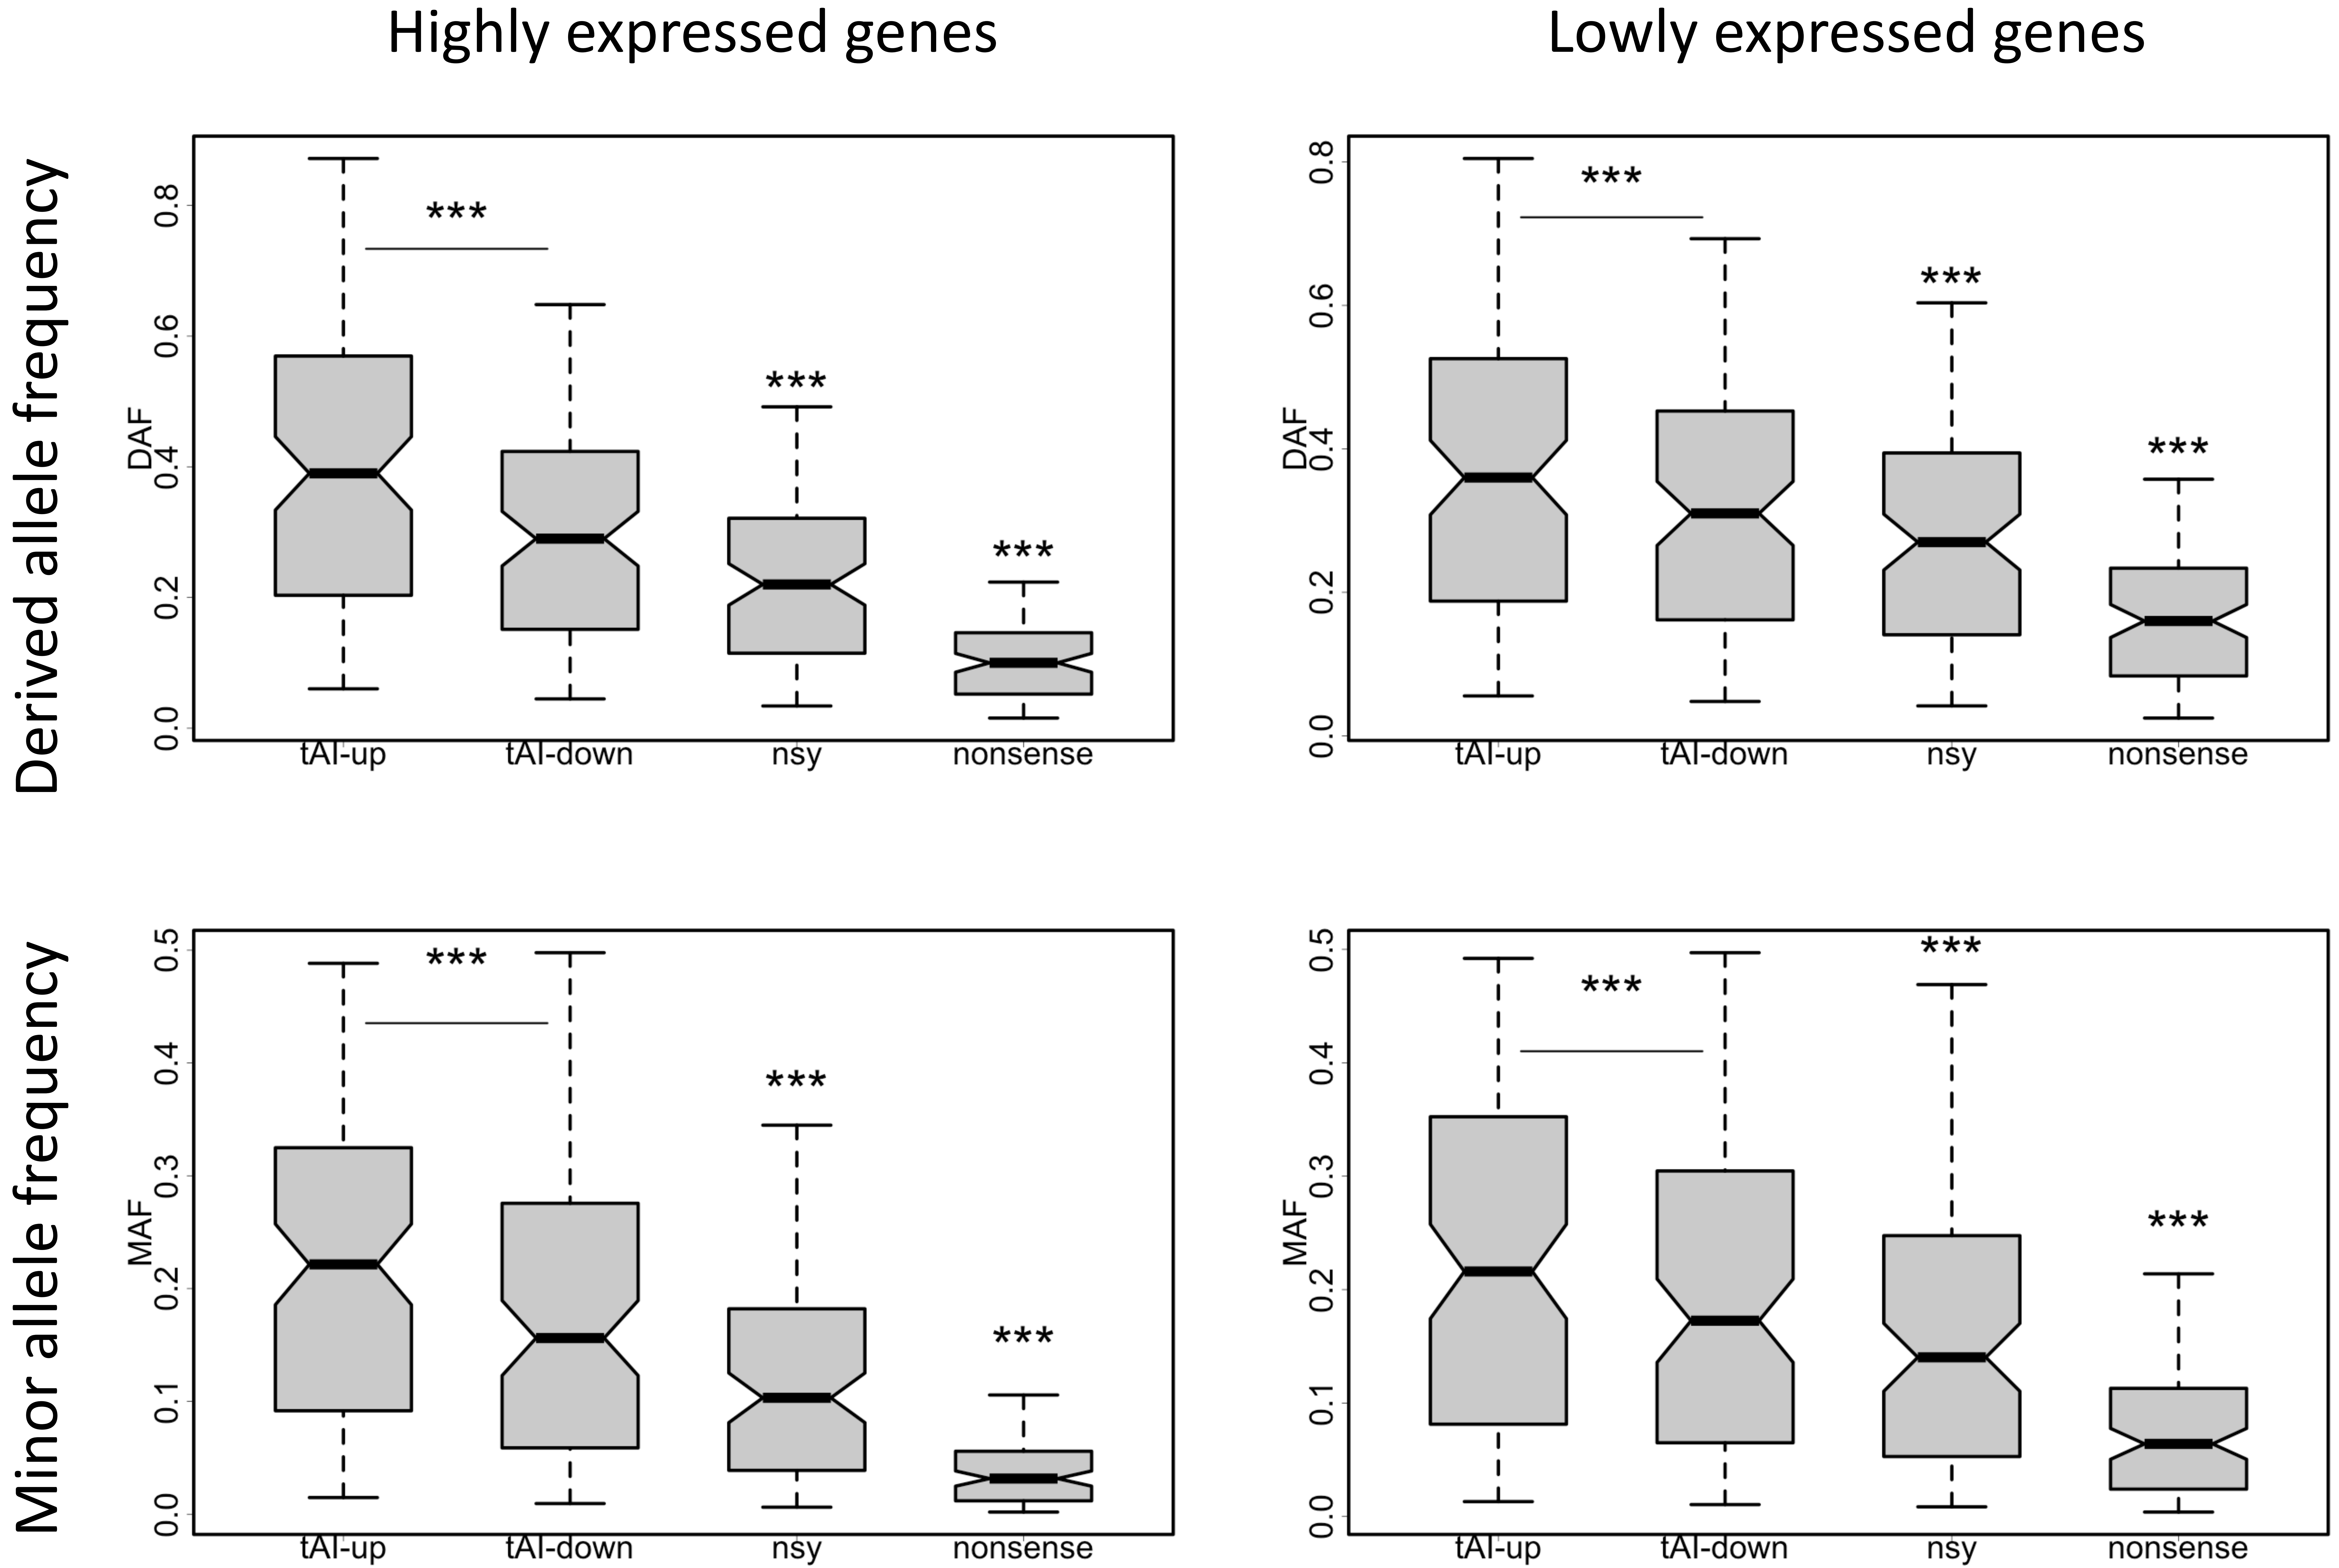

Figure S4

**A**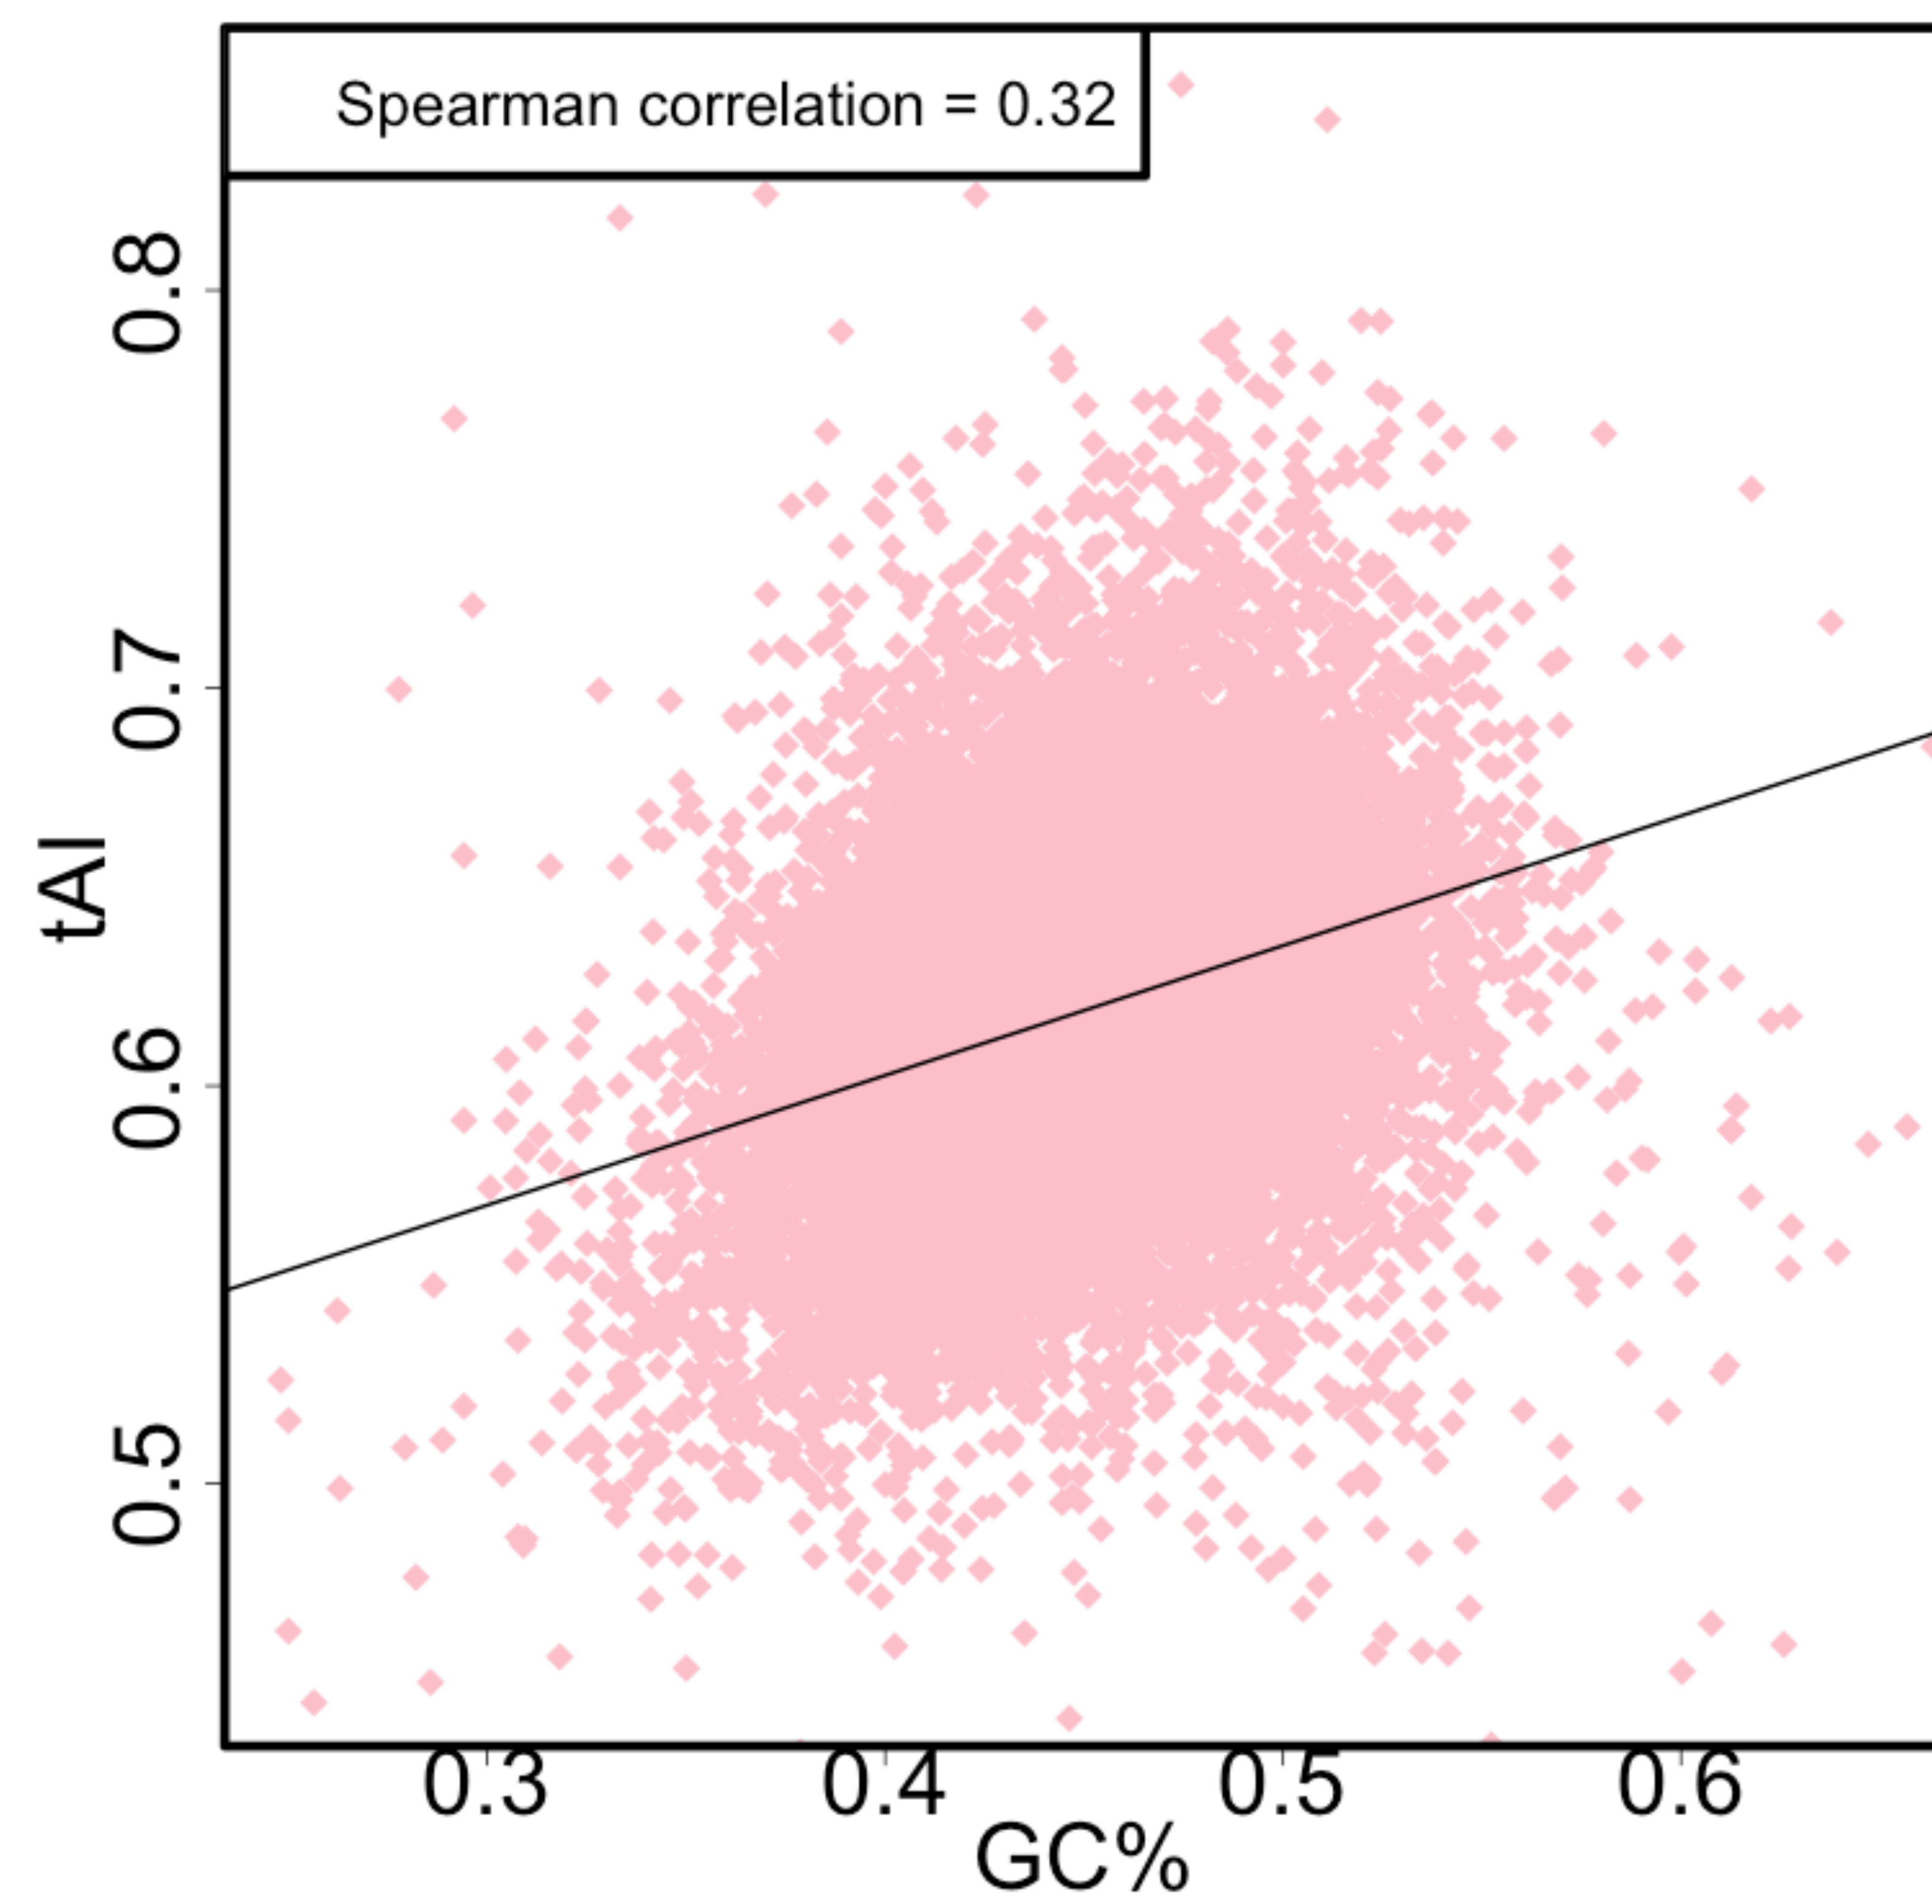**B**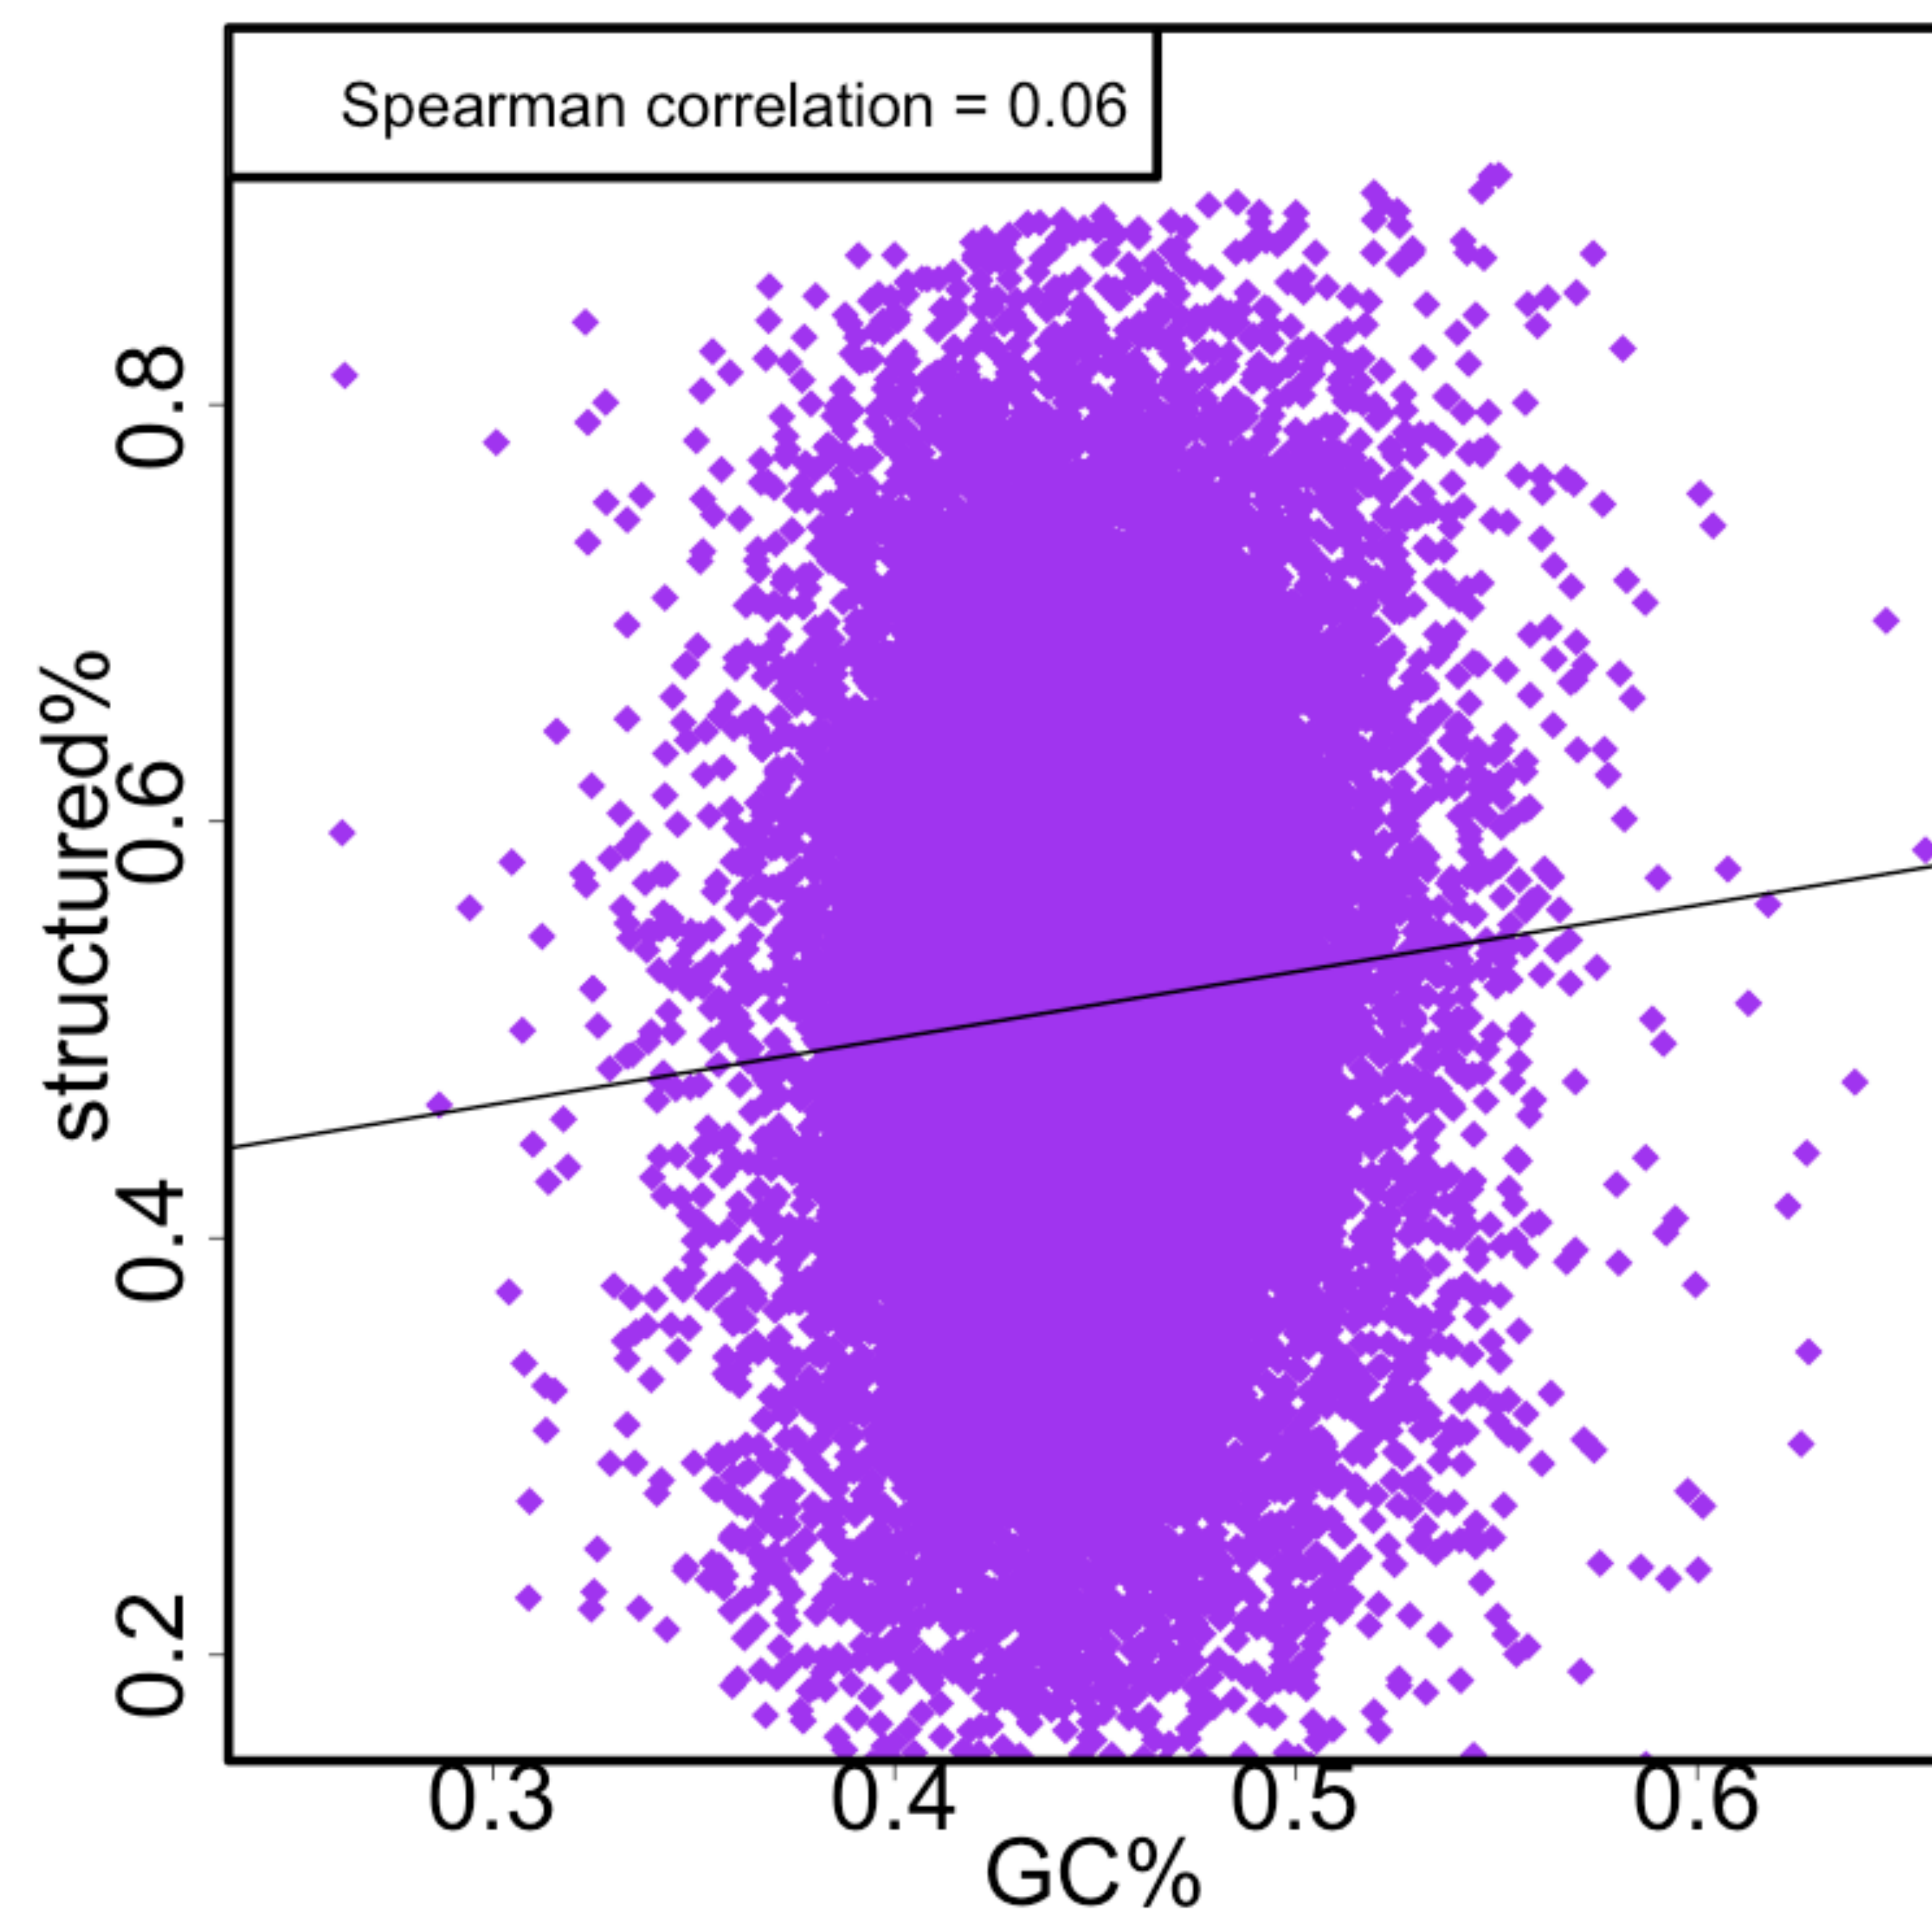**C**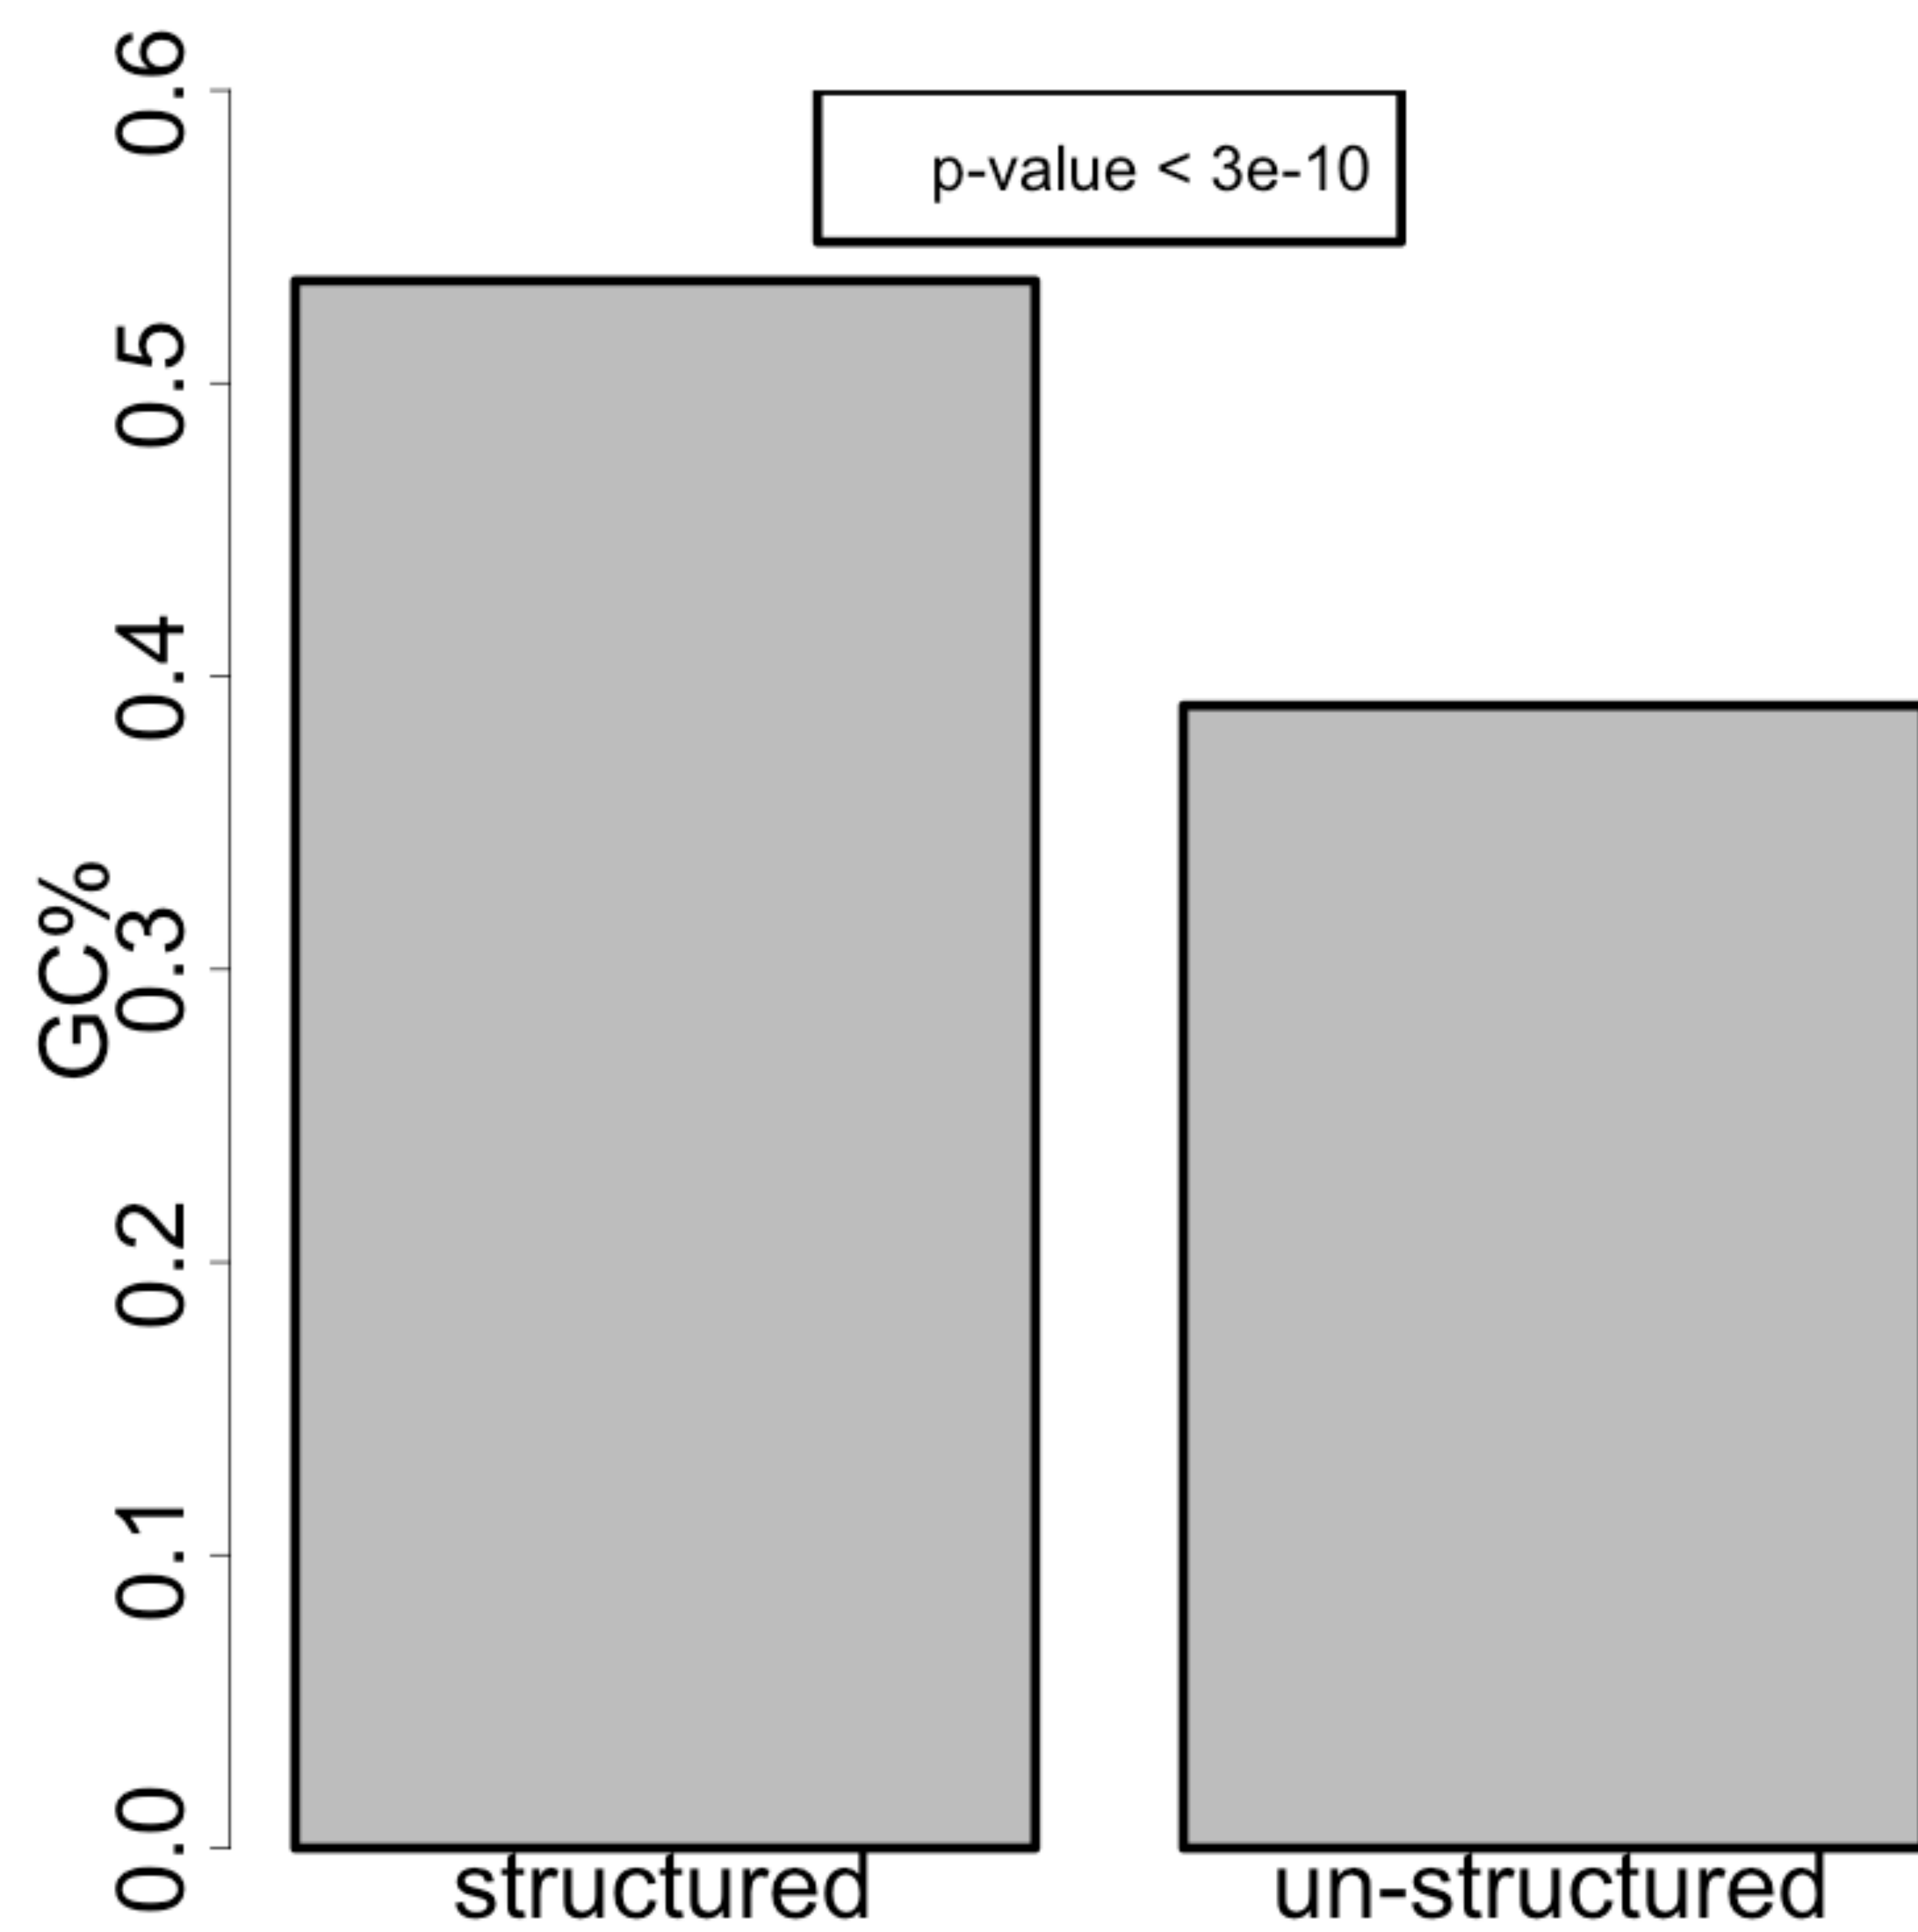**D**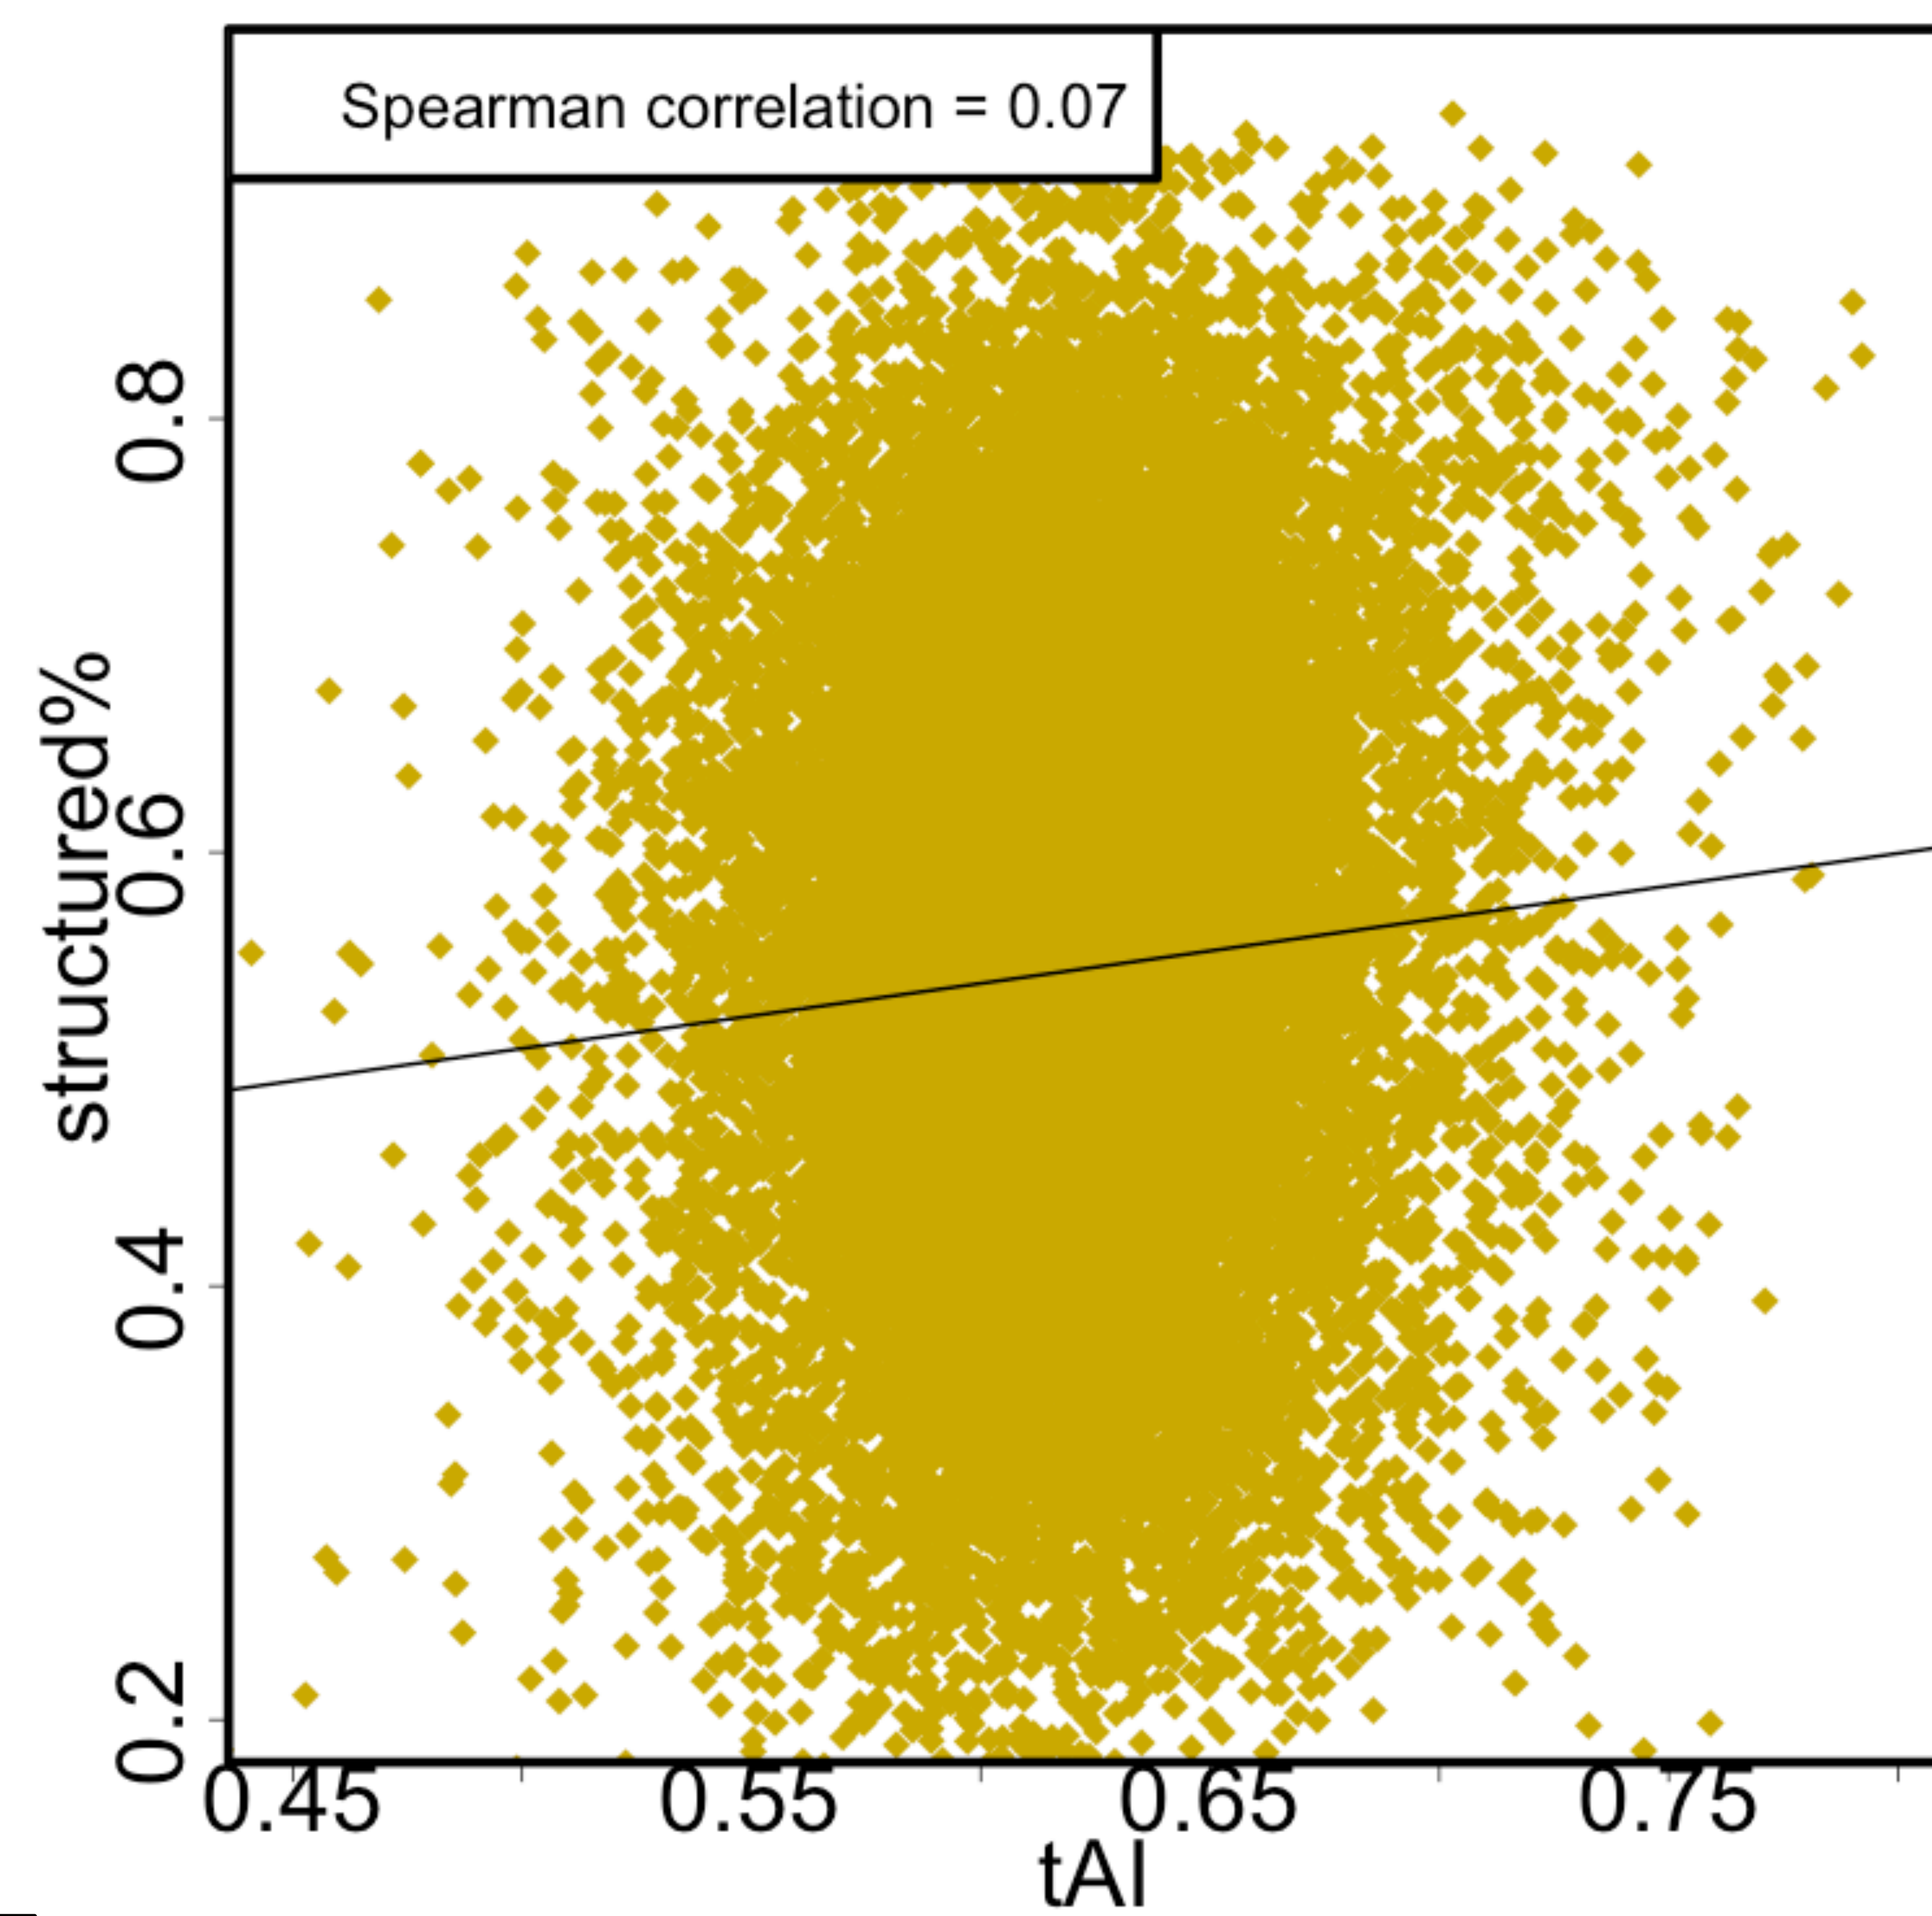**Figure S5**

# Frequency spectrum of the polymorphic mutations

## High GC genes

## Low GC genes

Derived allele frequency

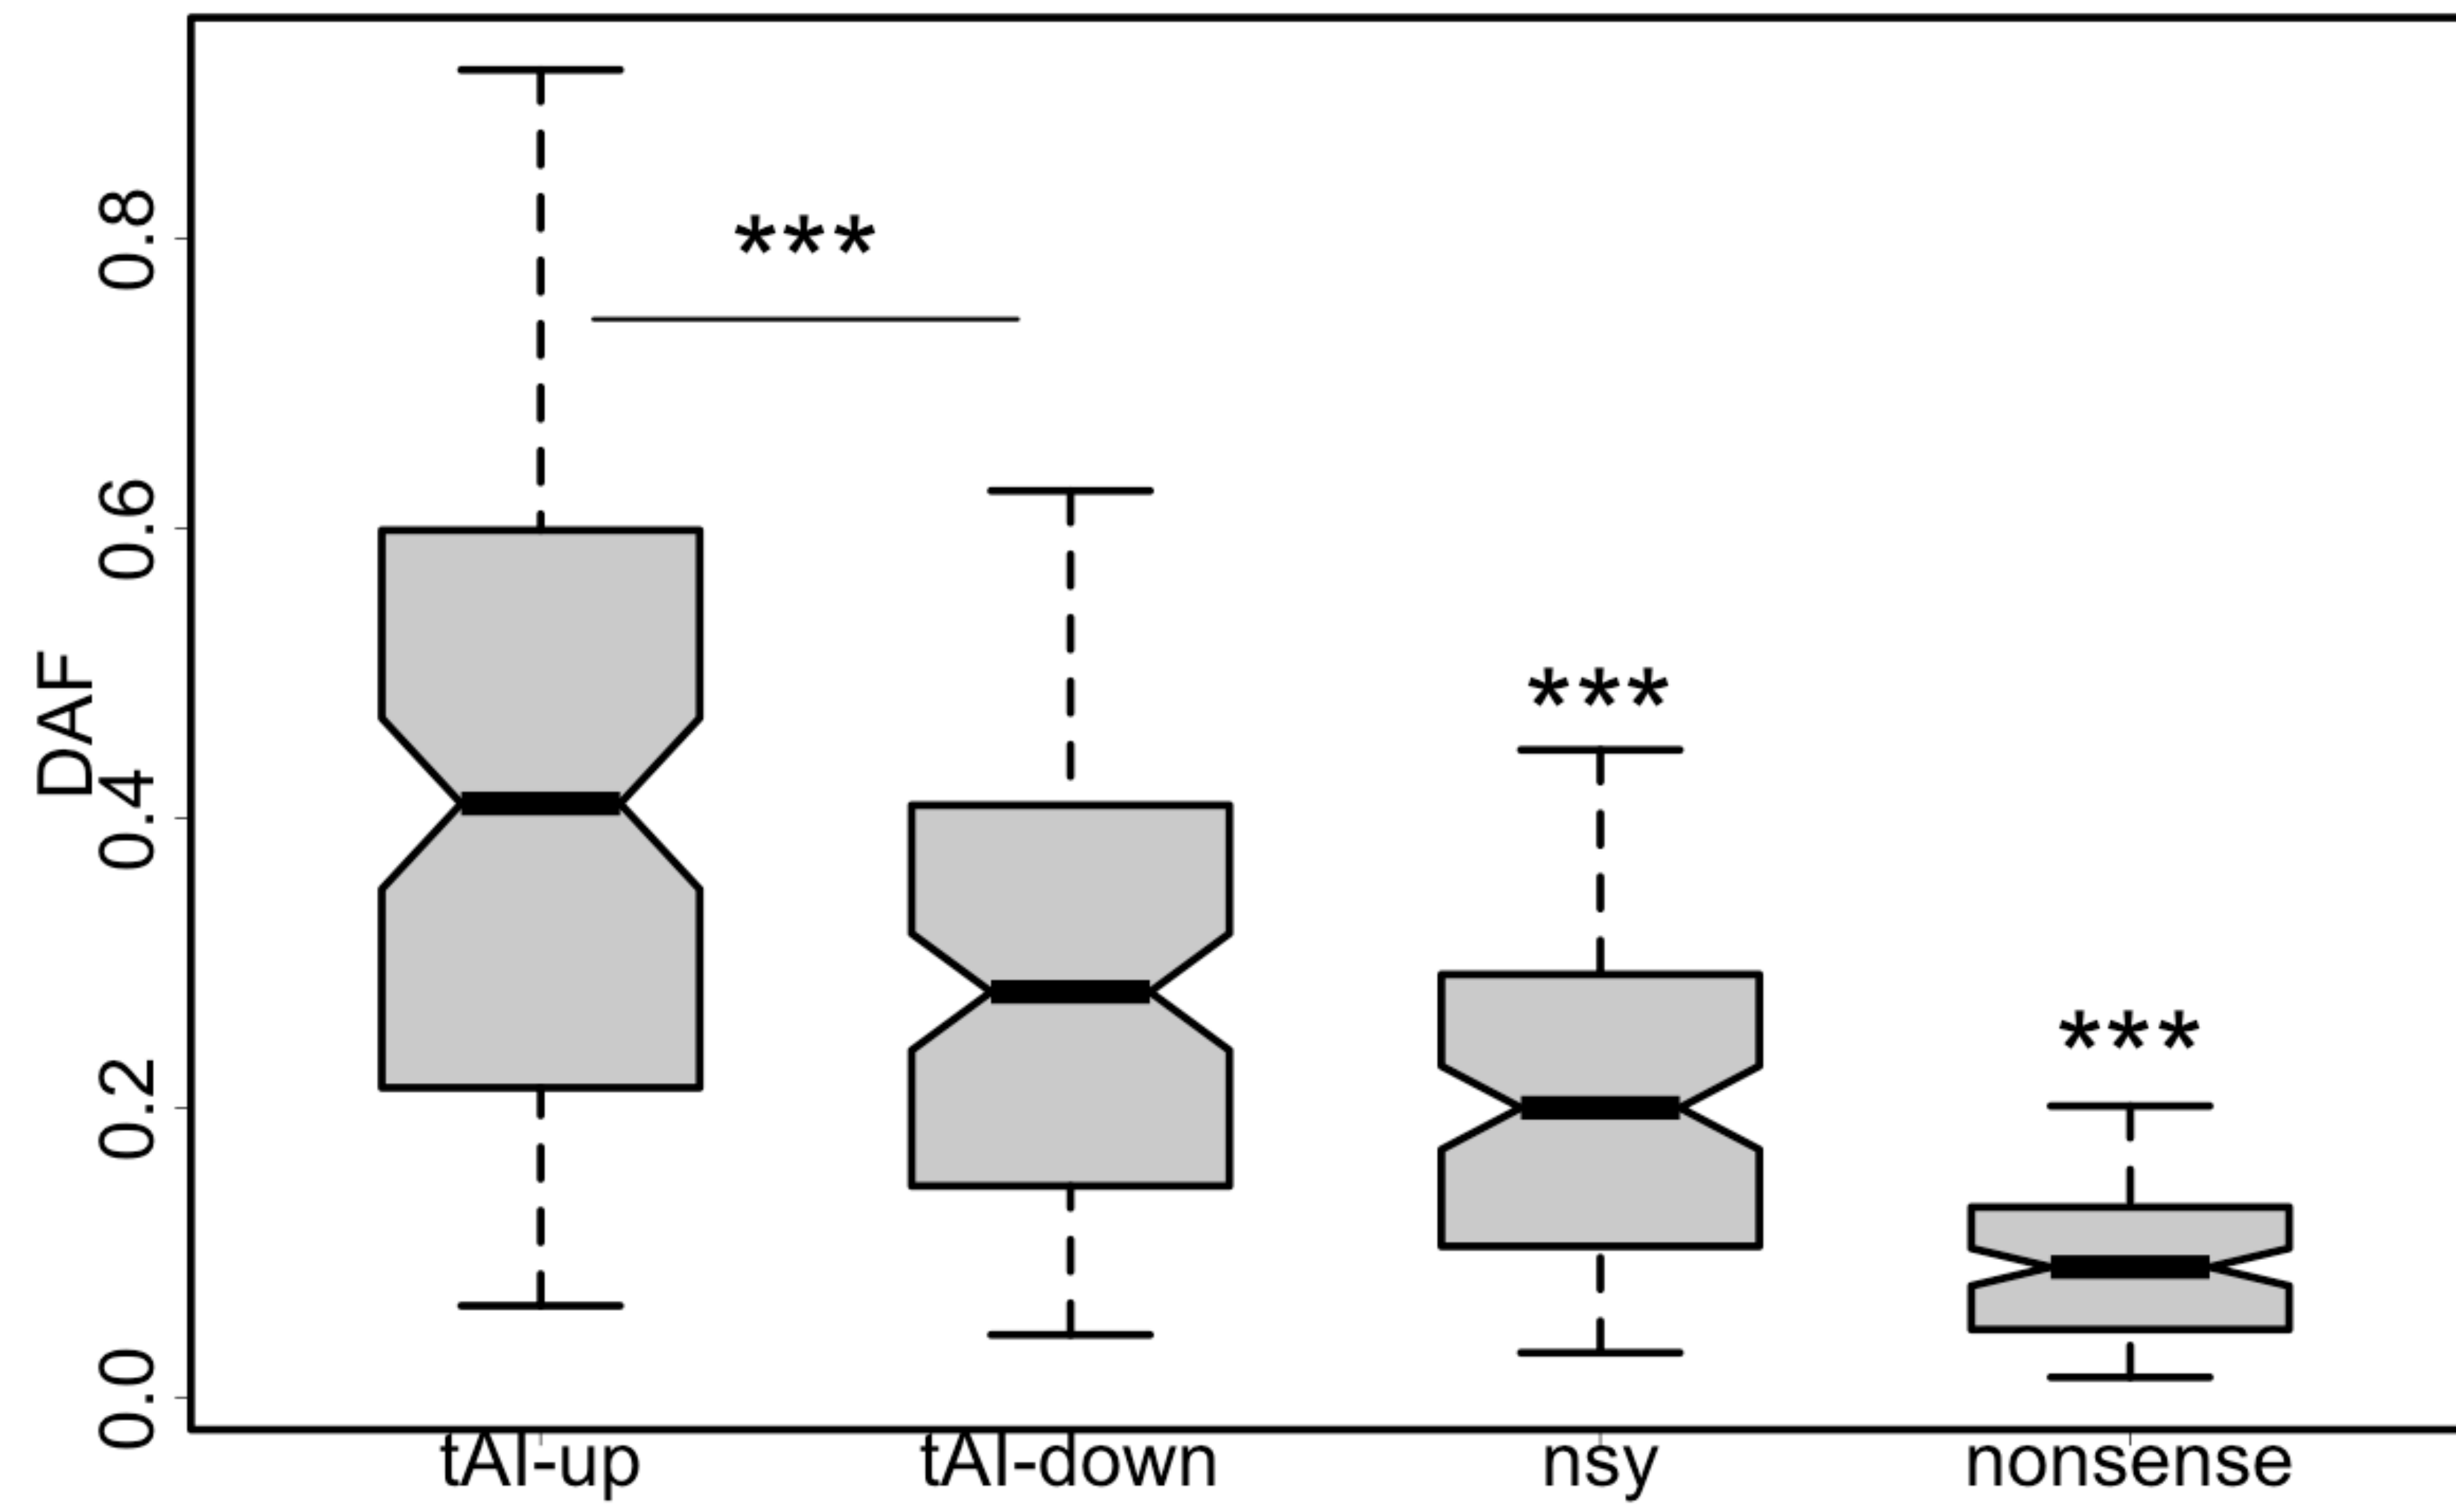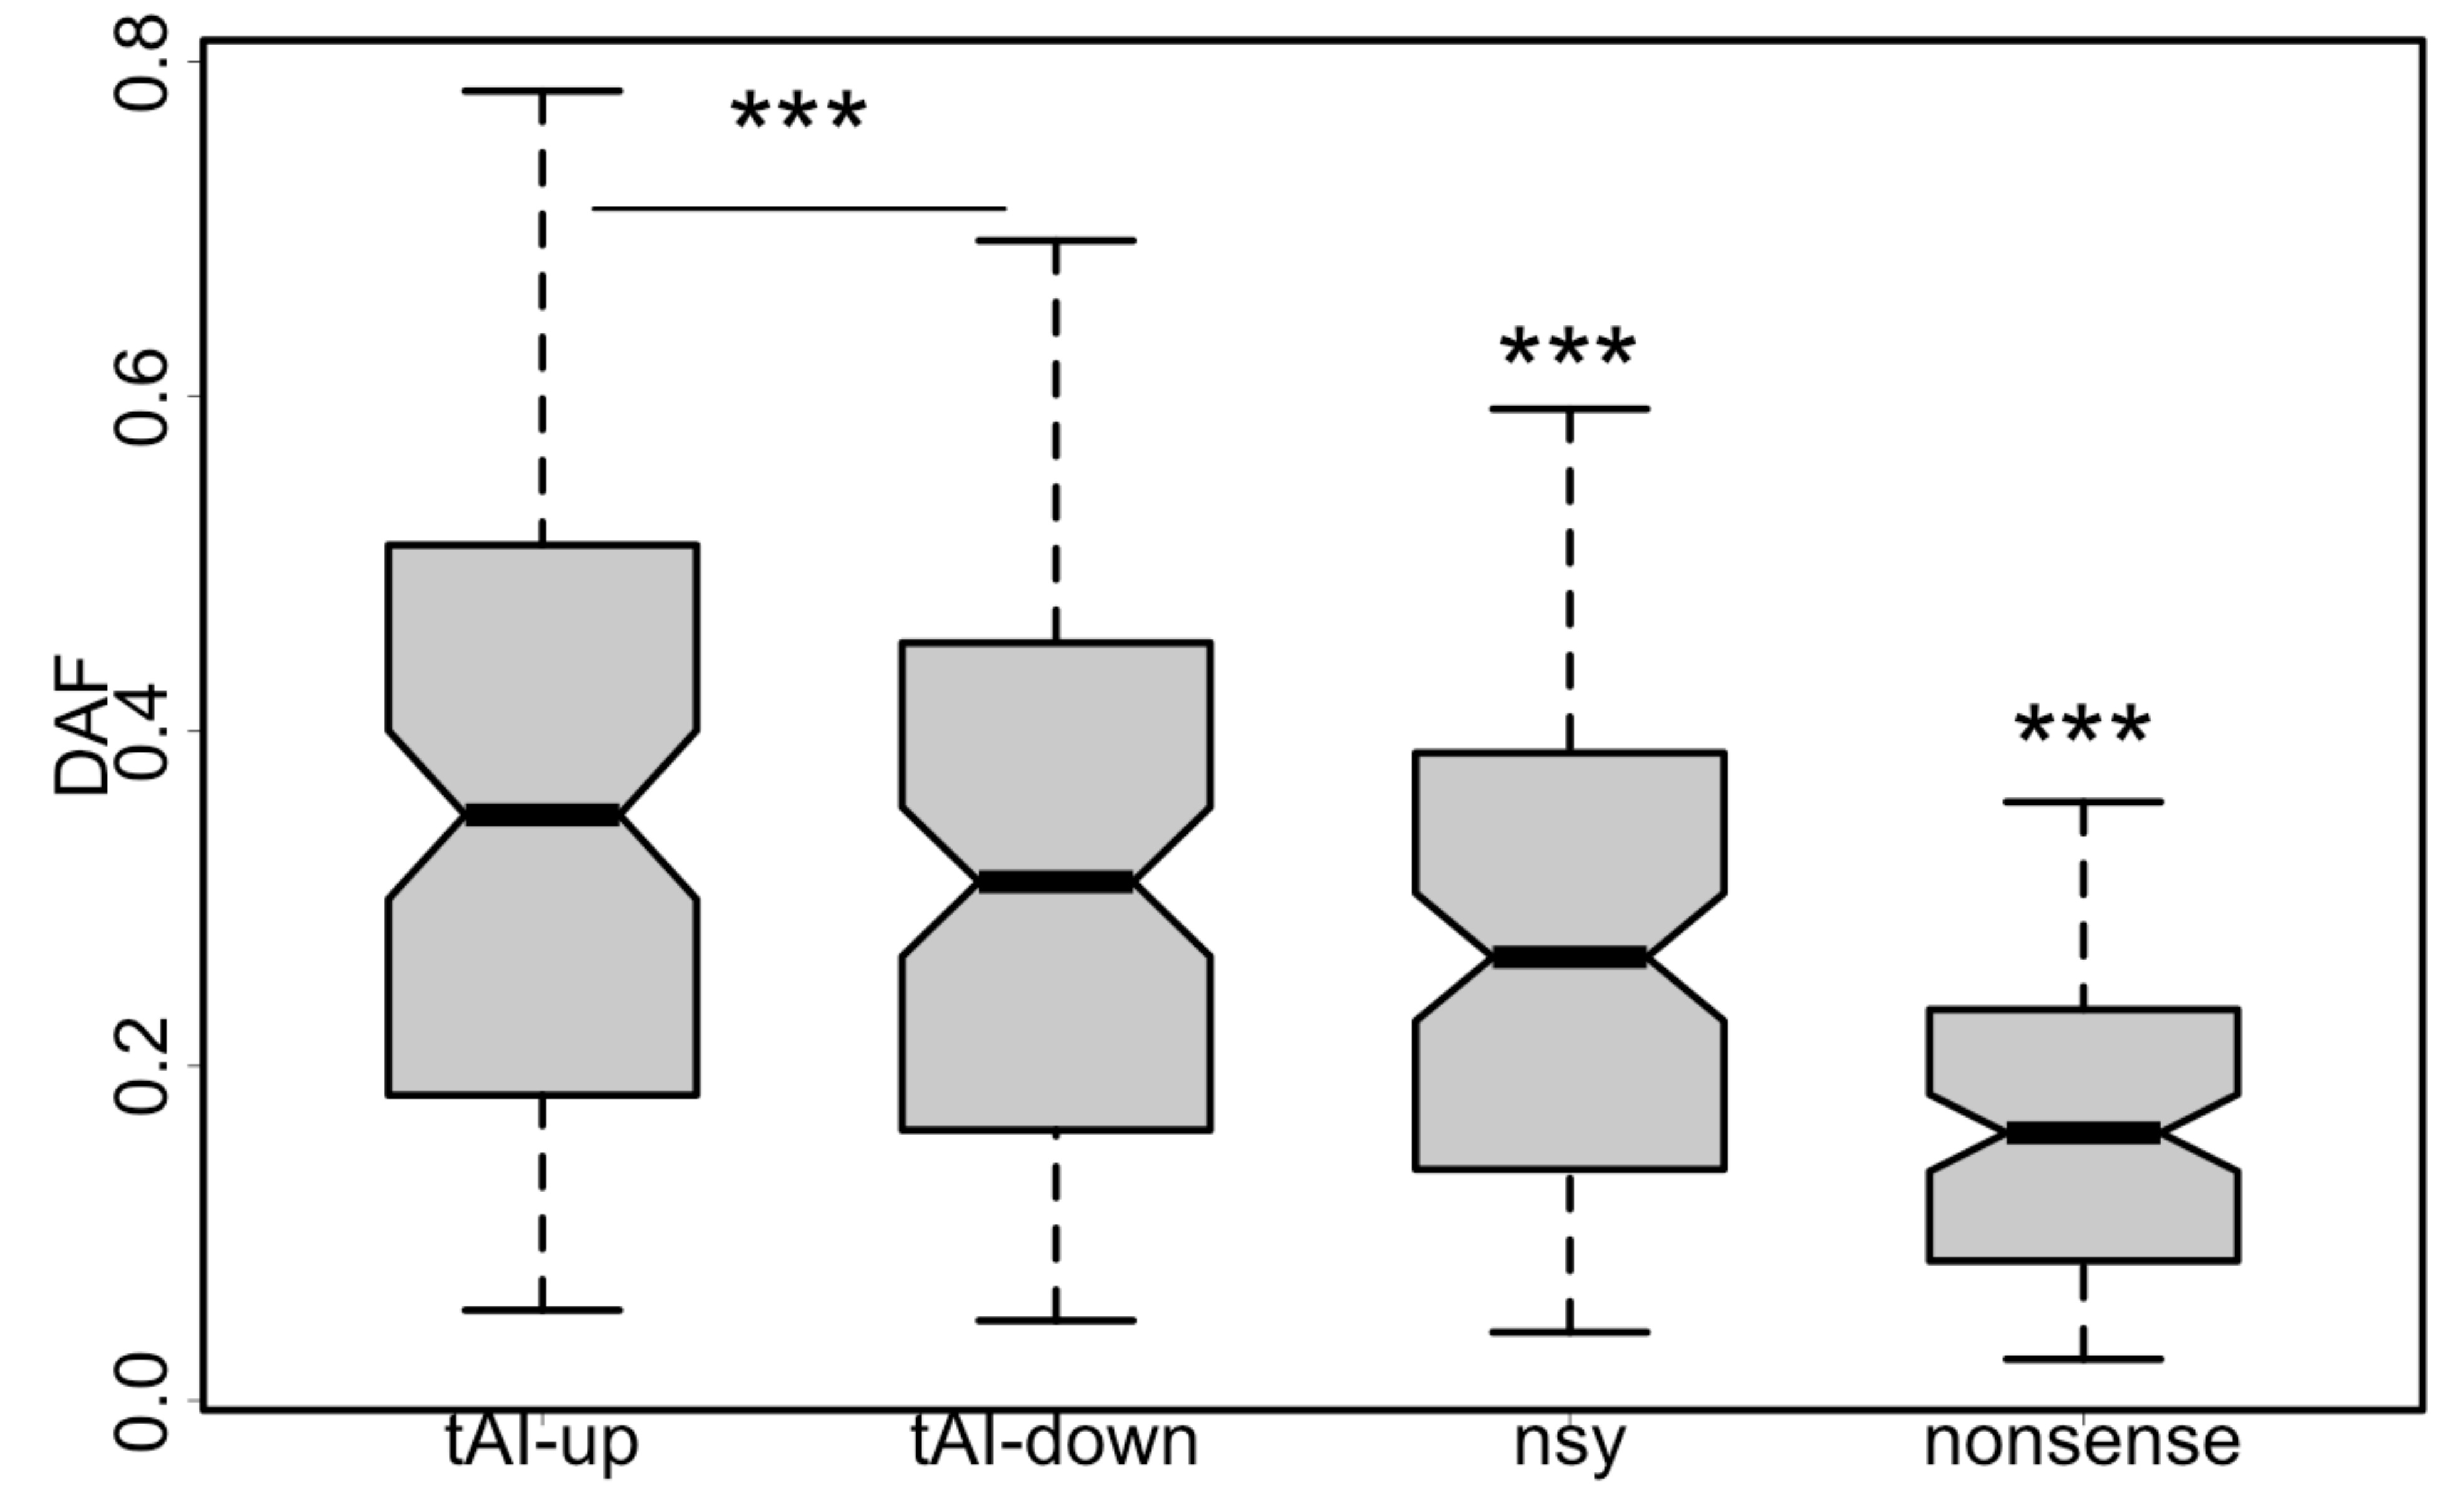

Minor allele frequency

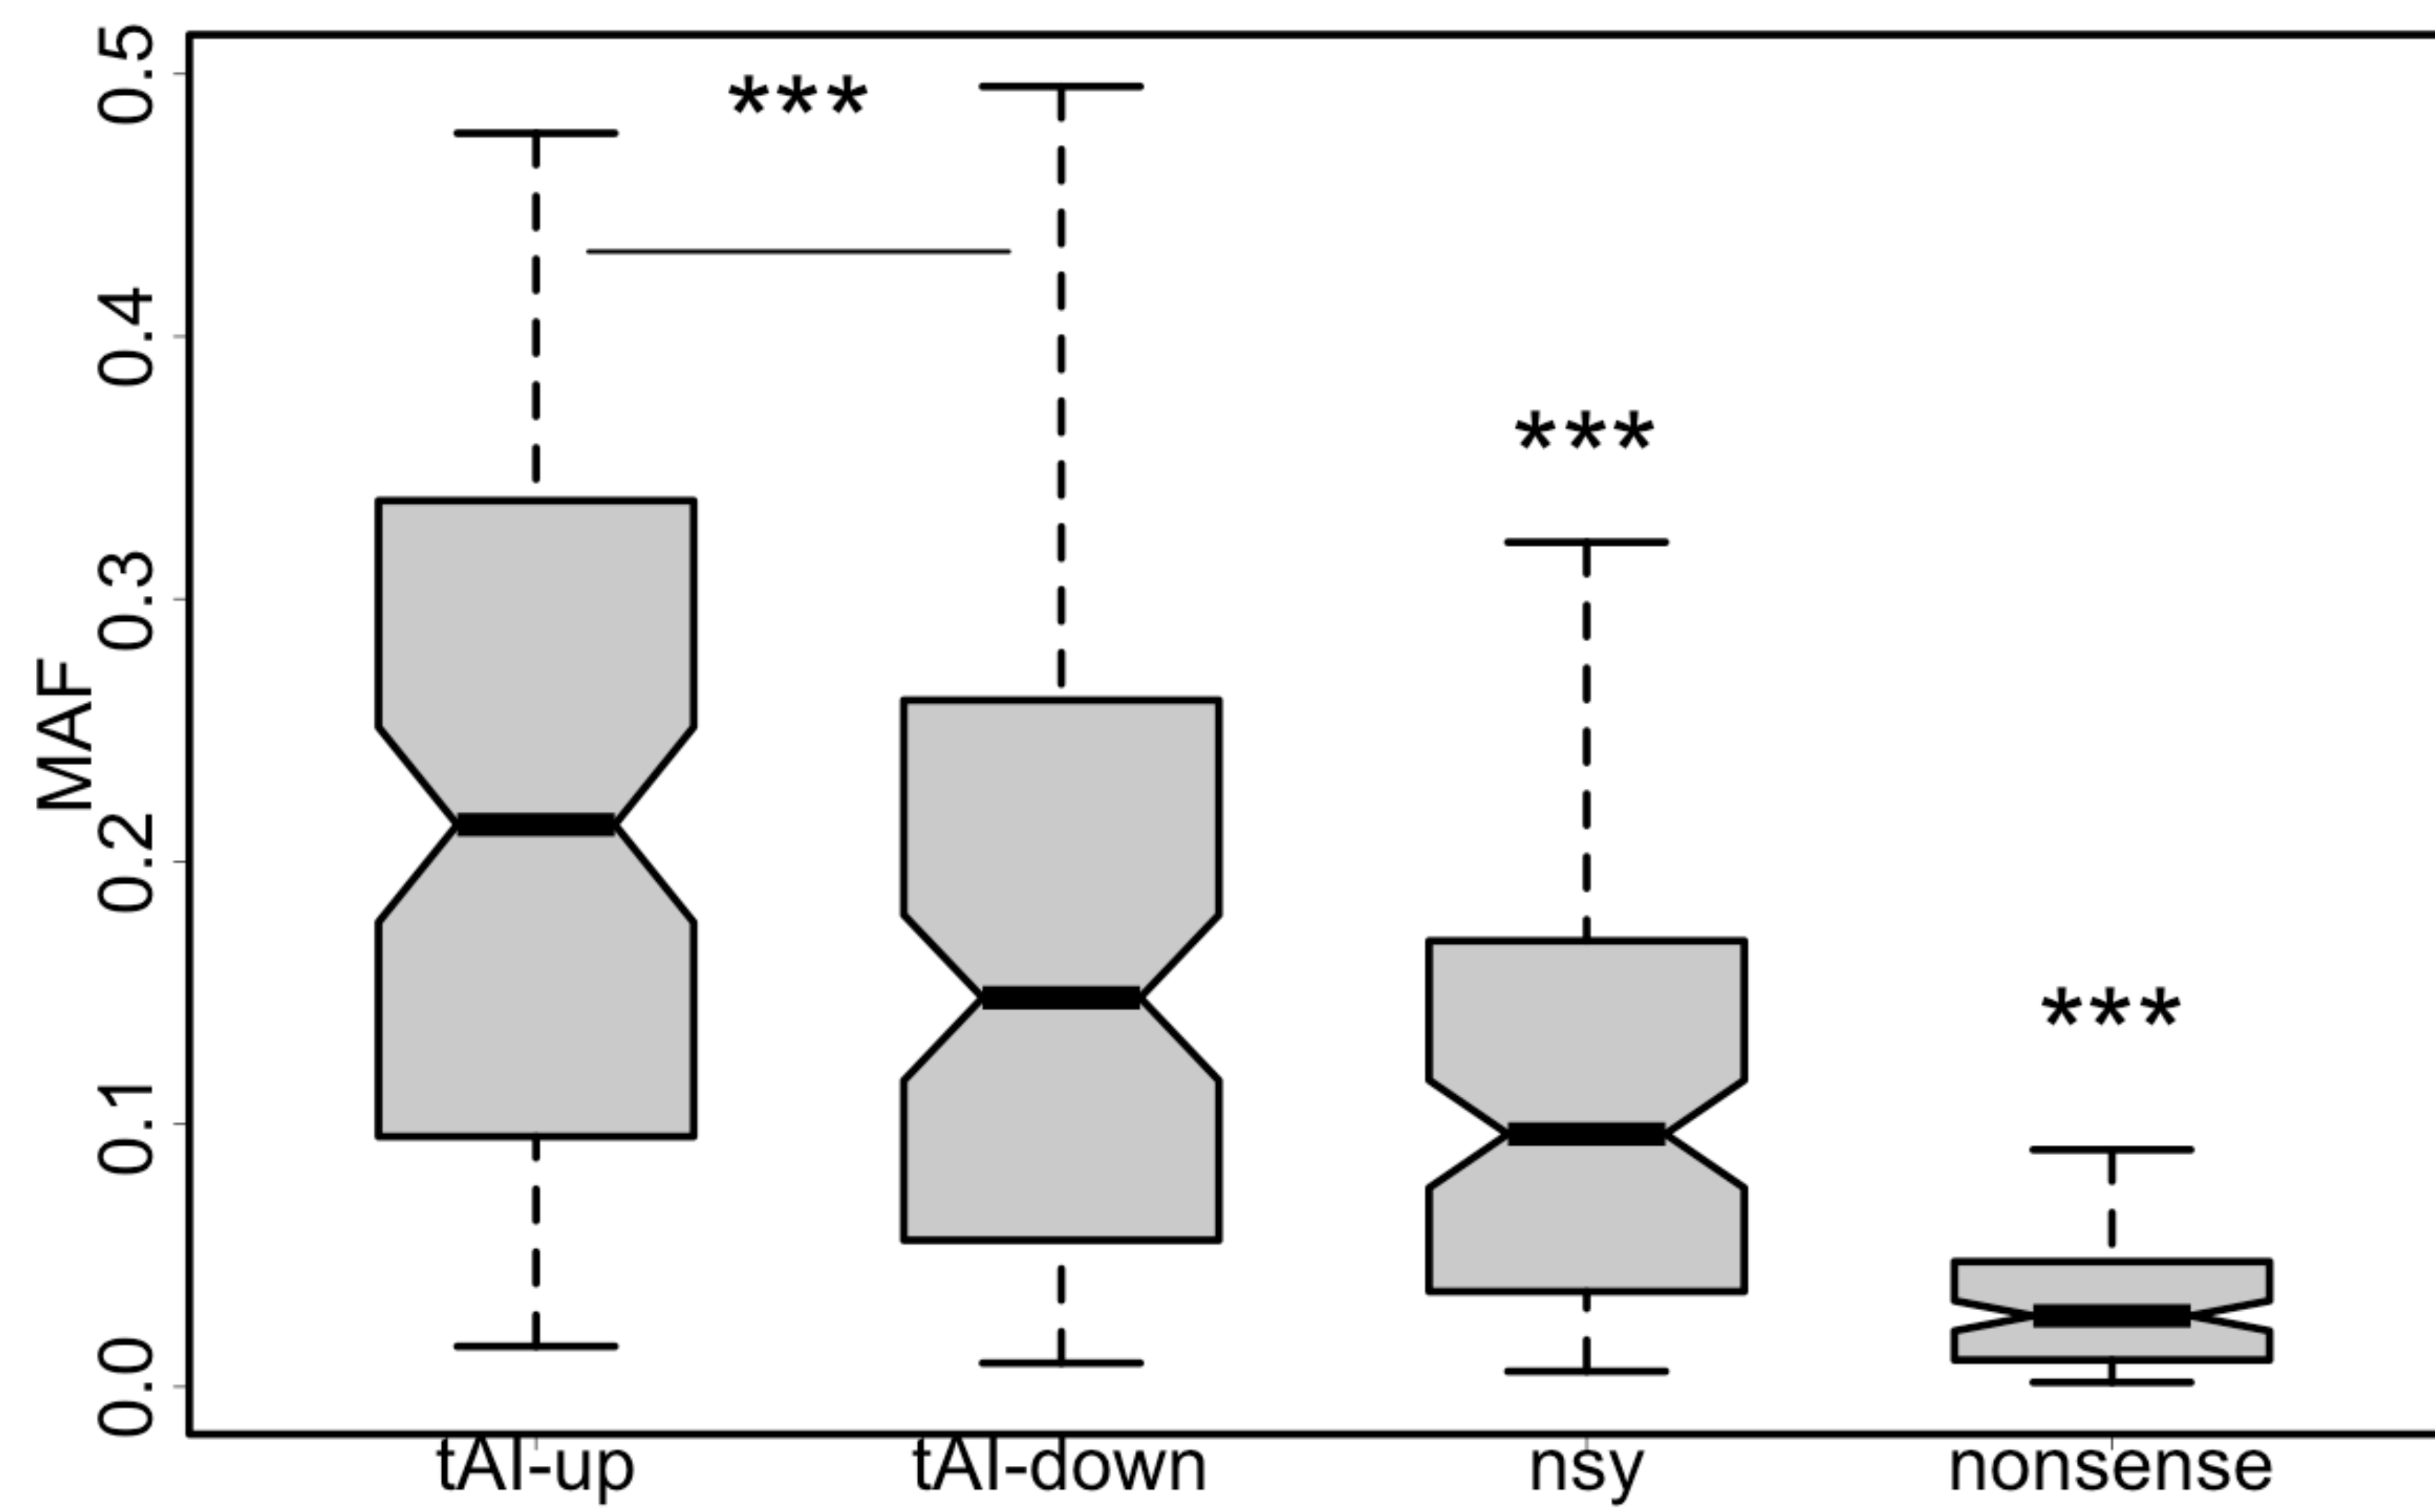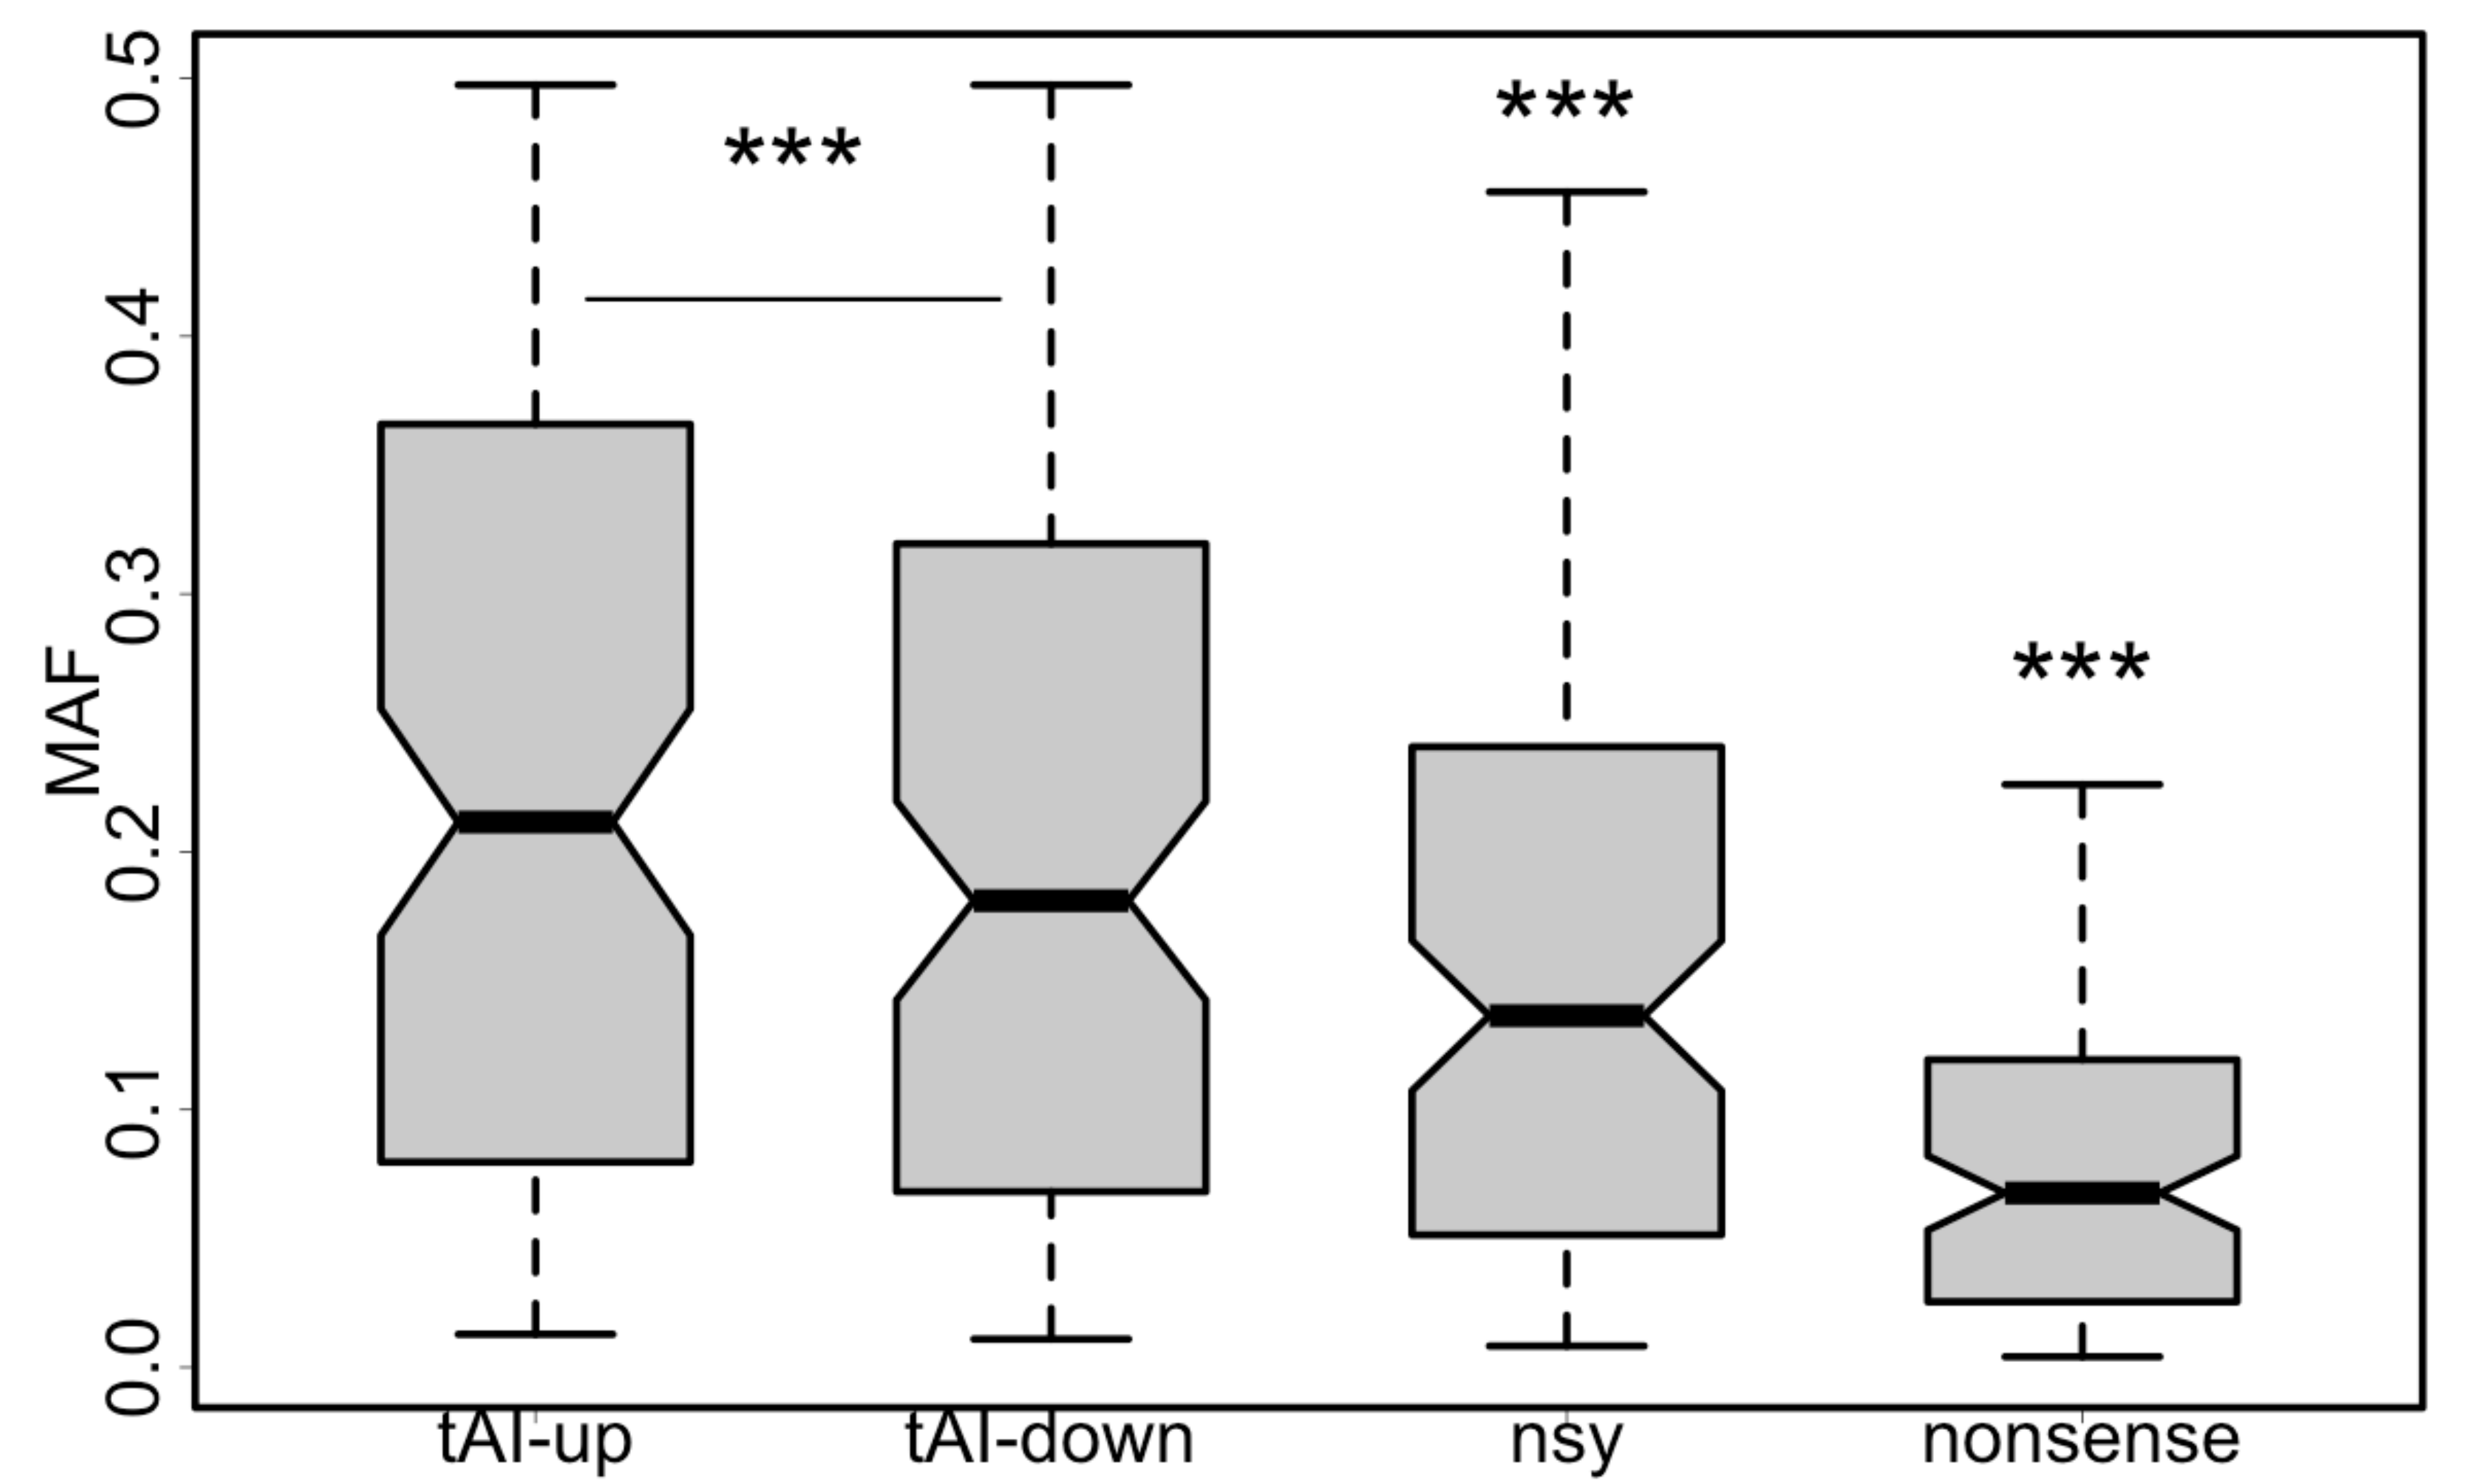

Figure S6

distance between tAI-up and -down mutations

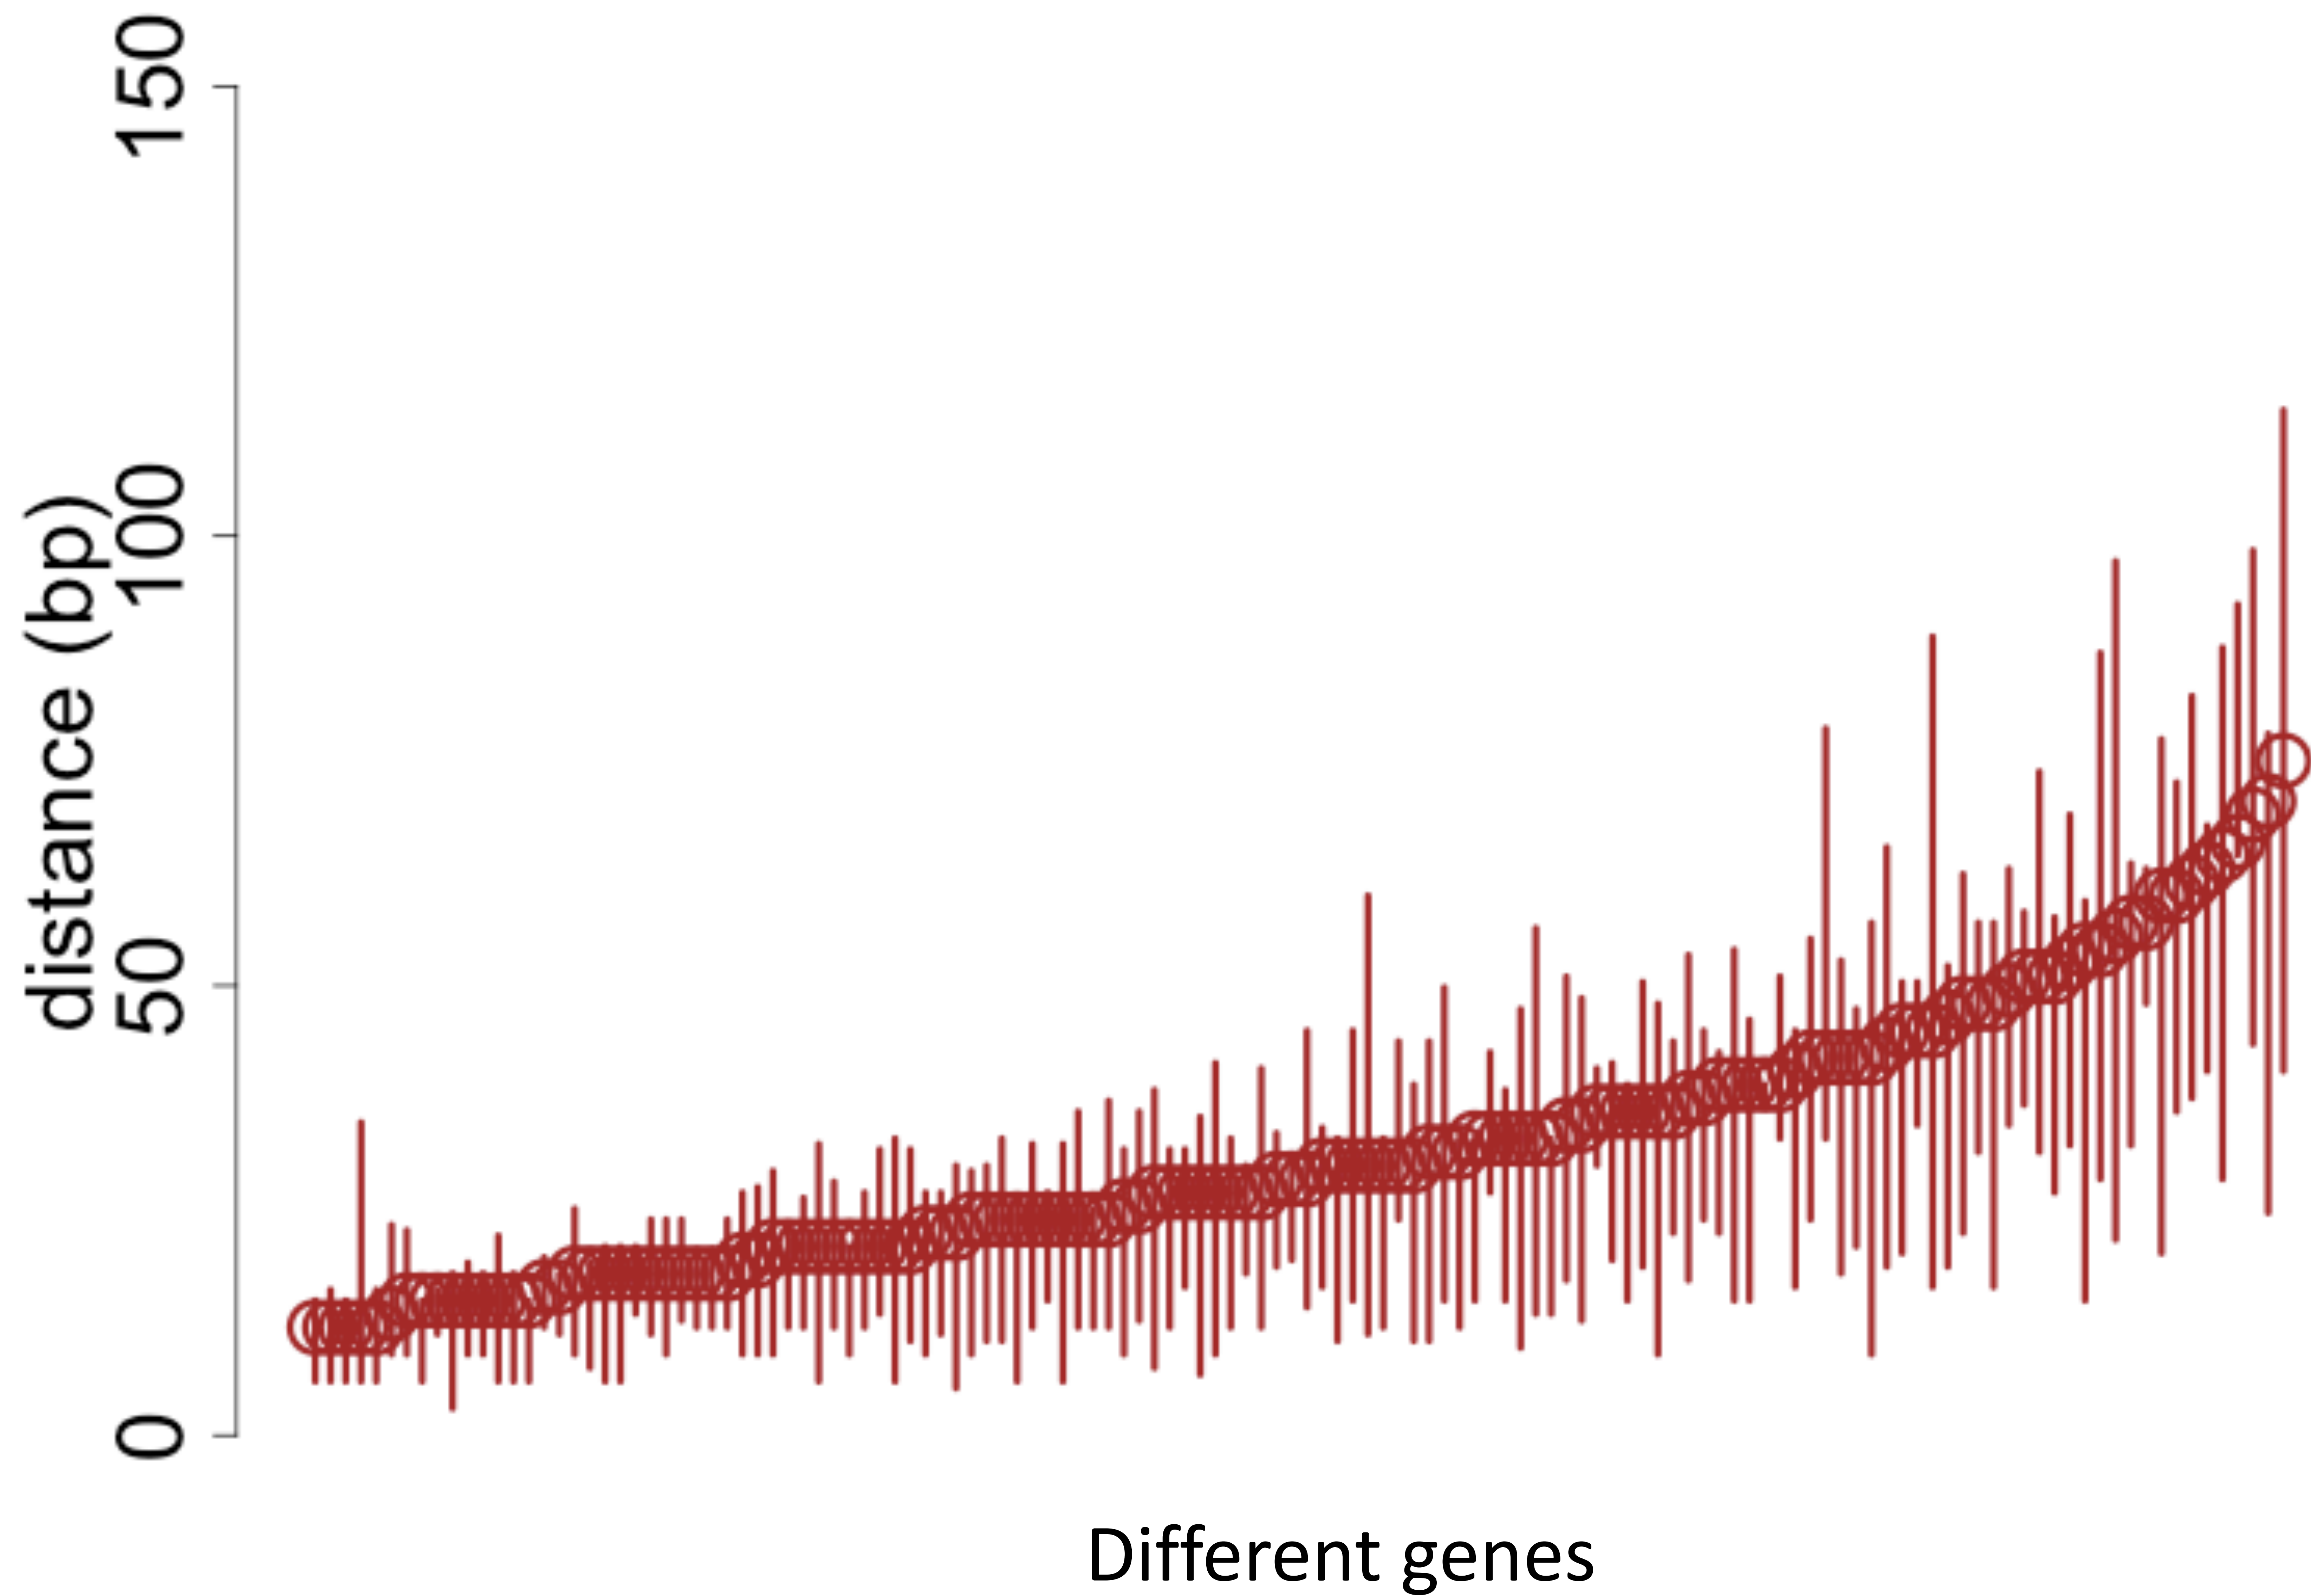

Figure S7

Derived allele frequency

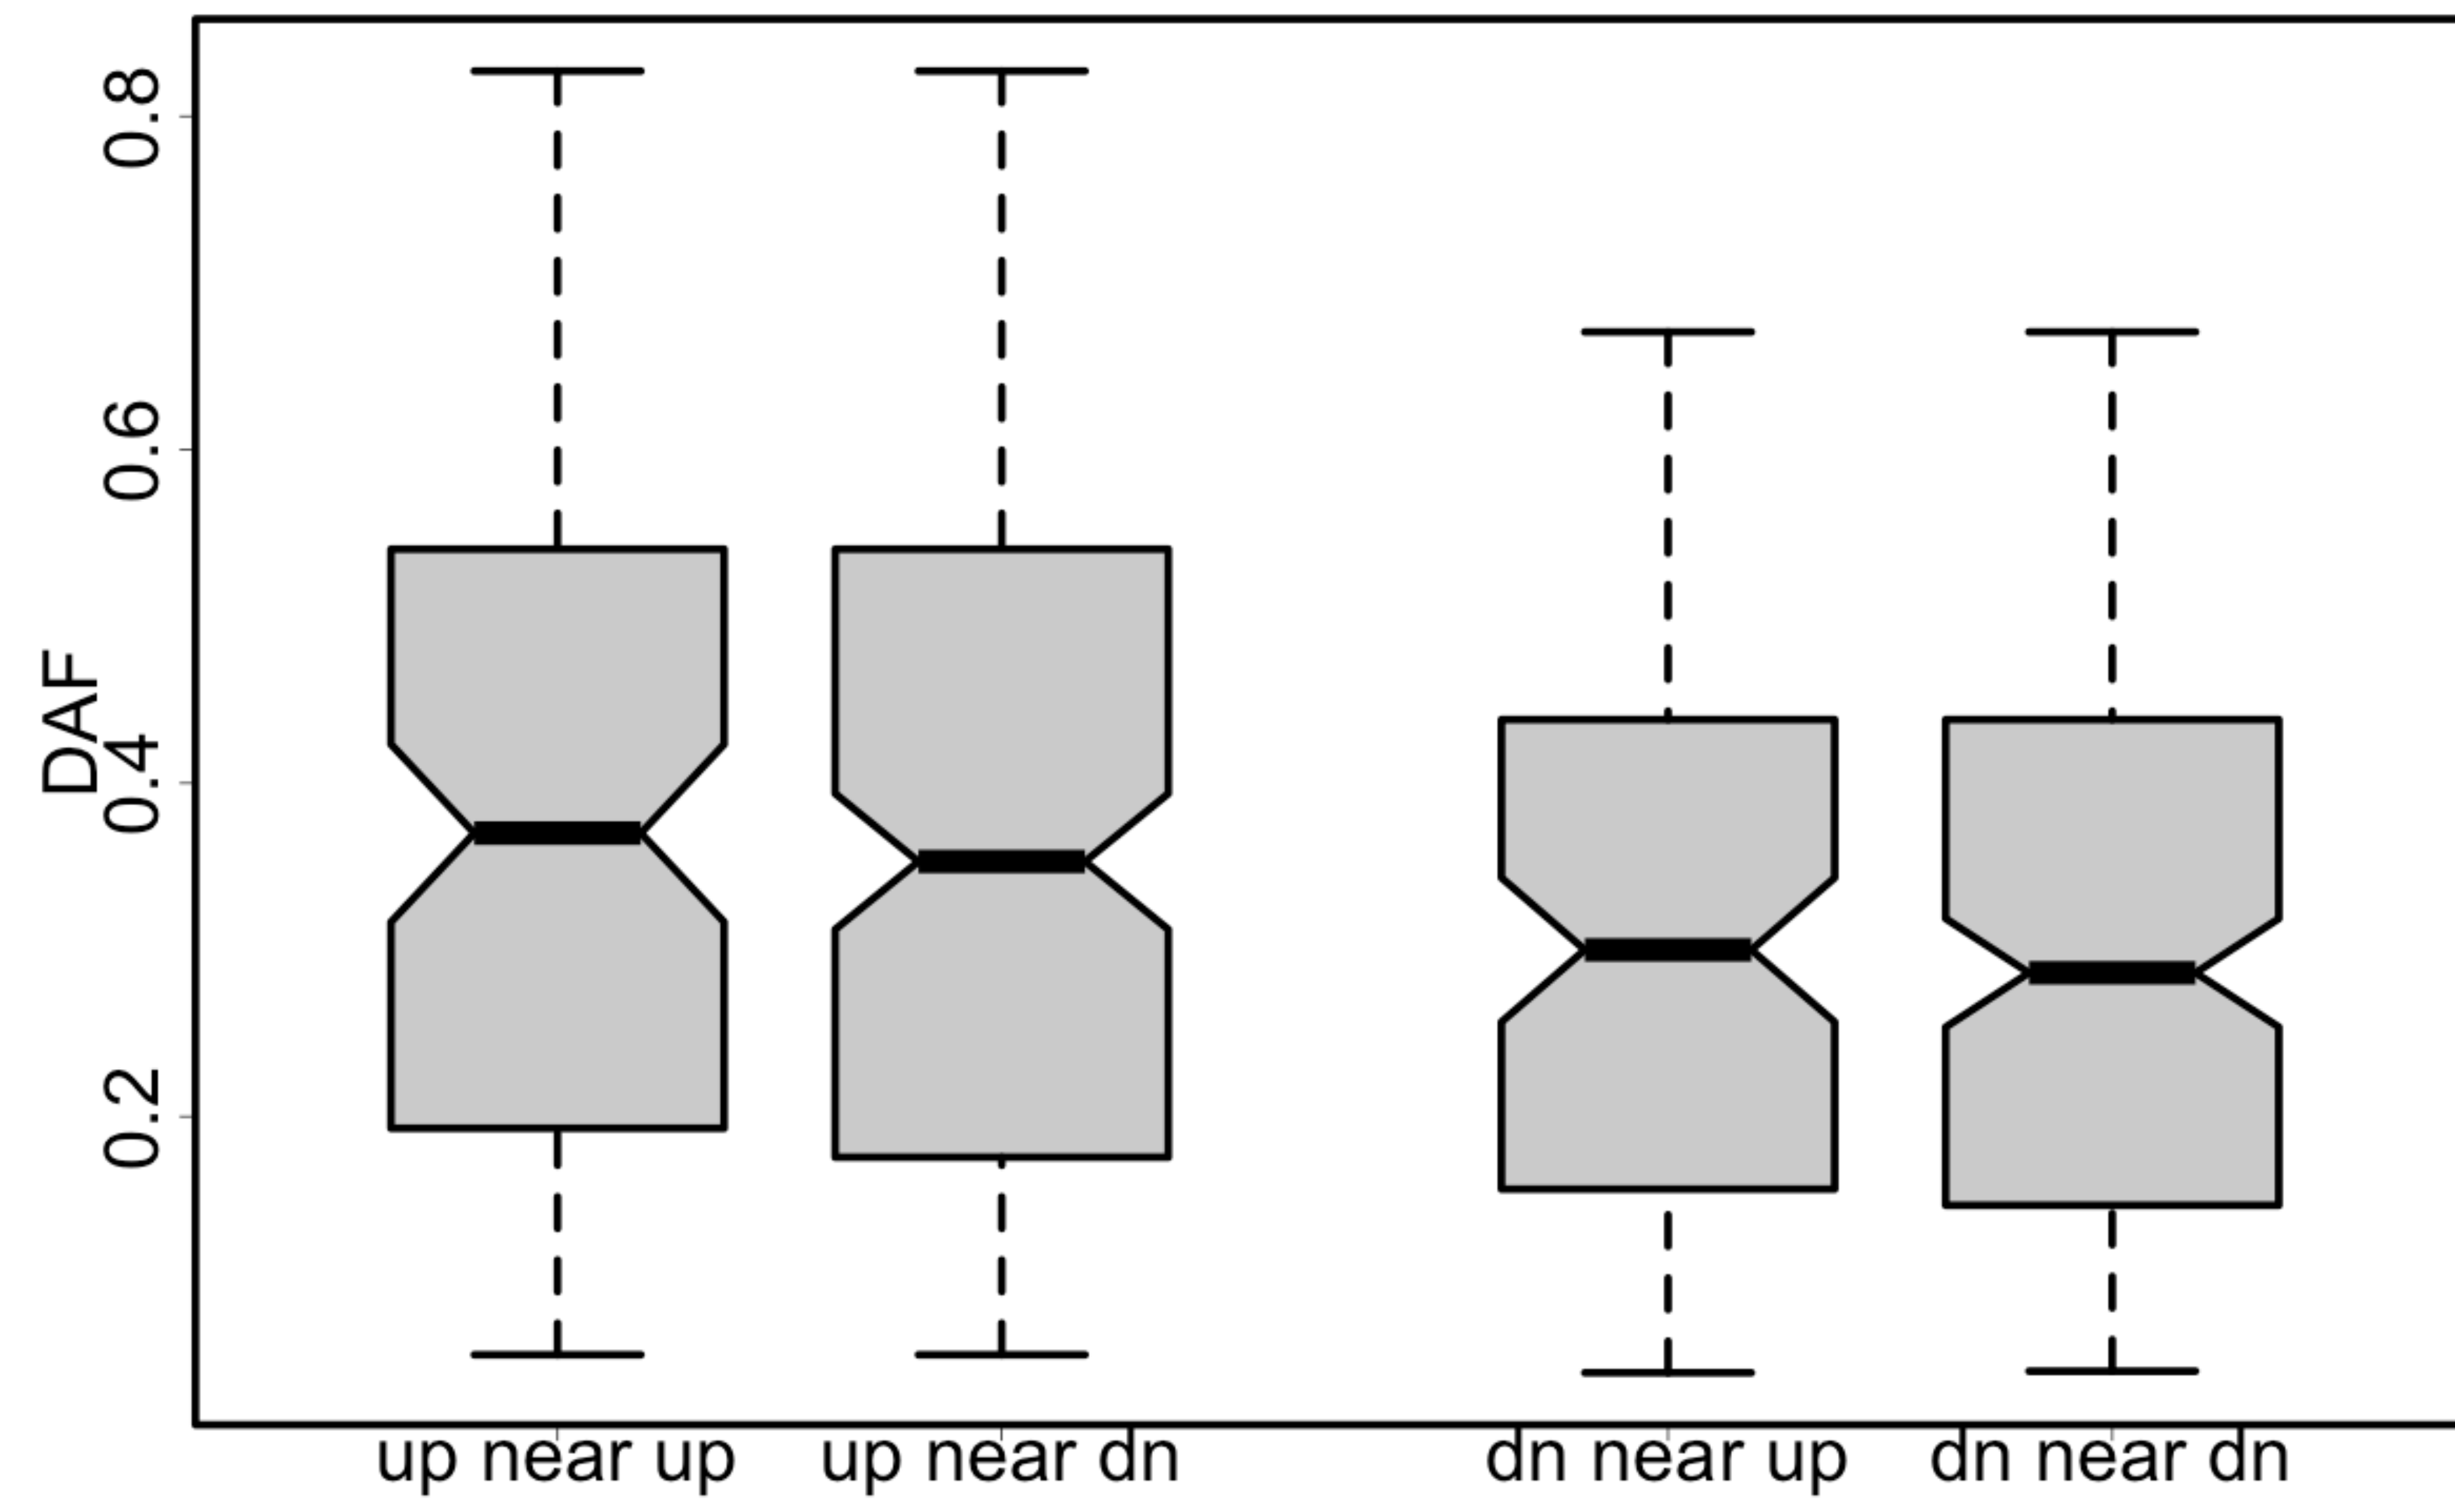

Minor allele frequency

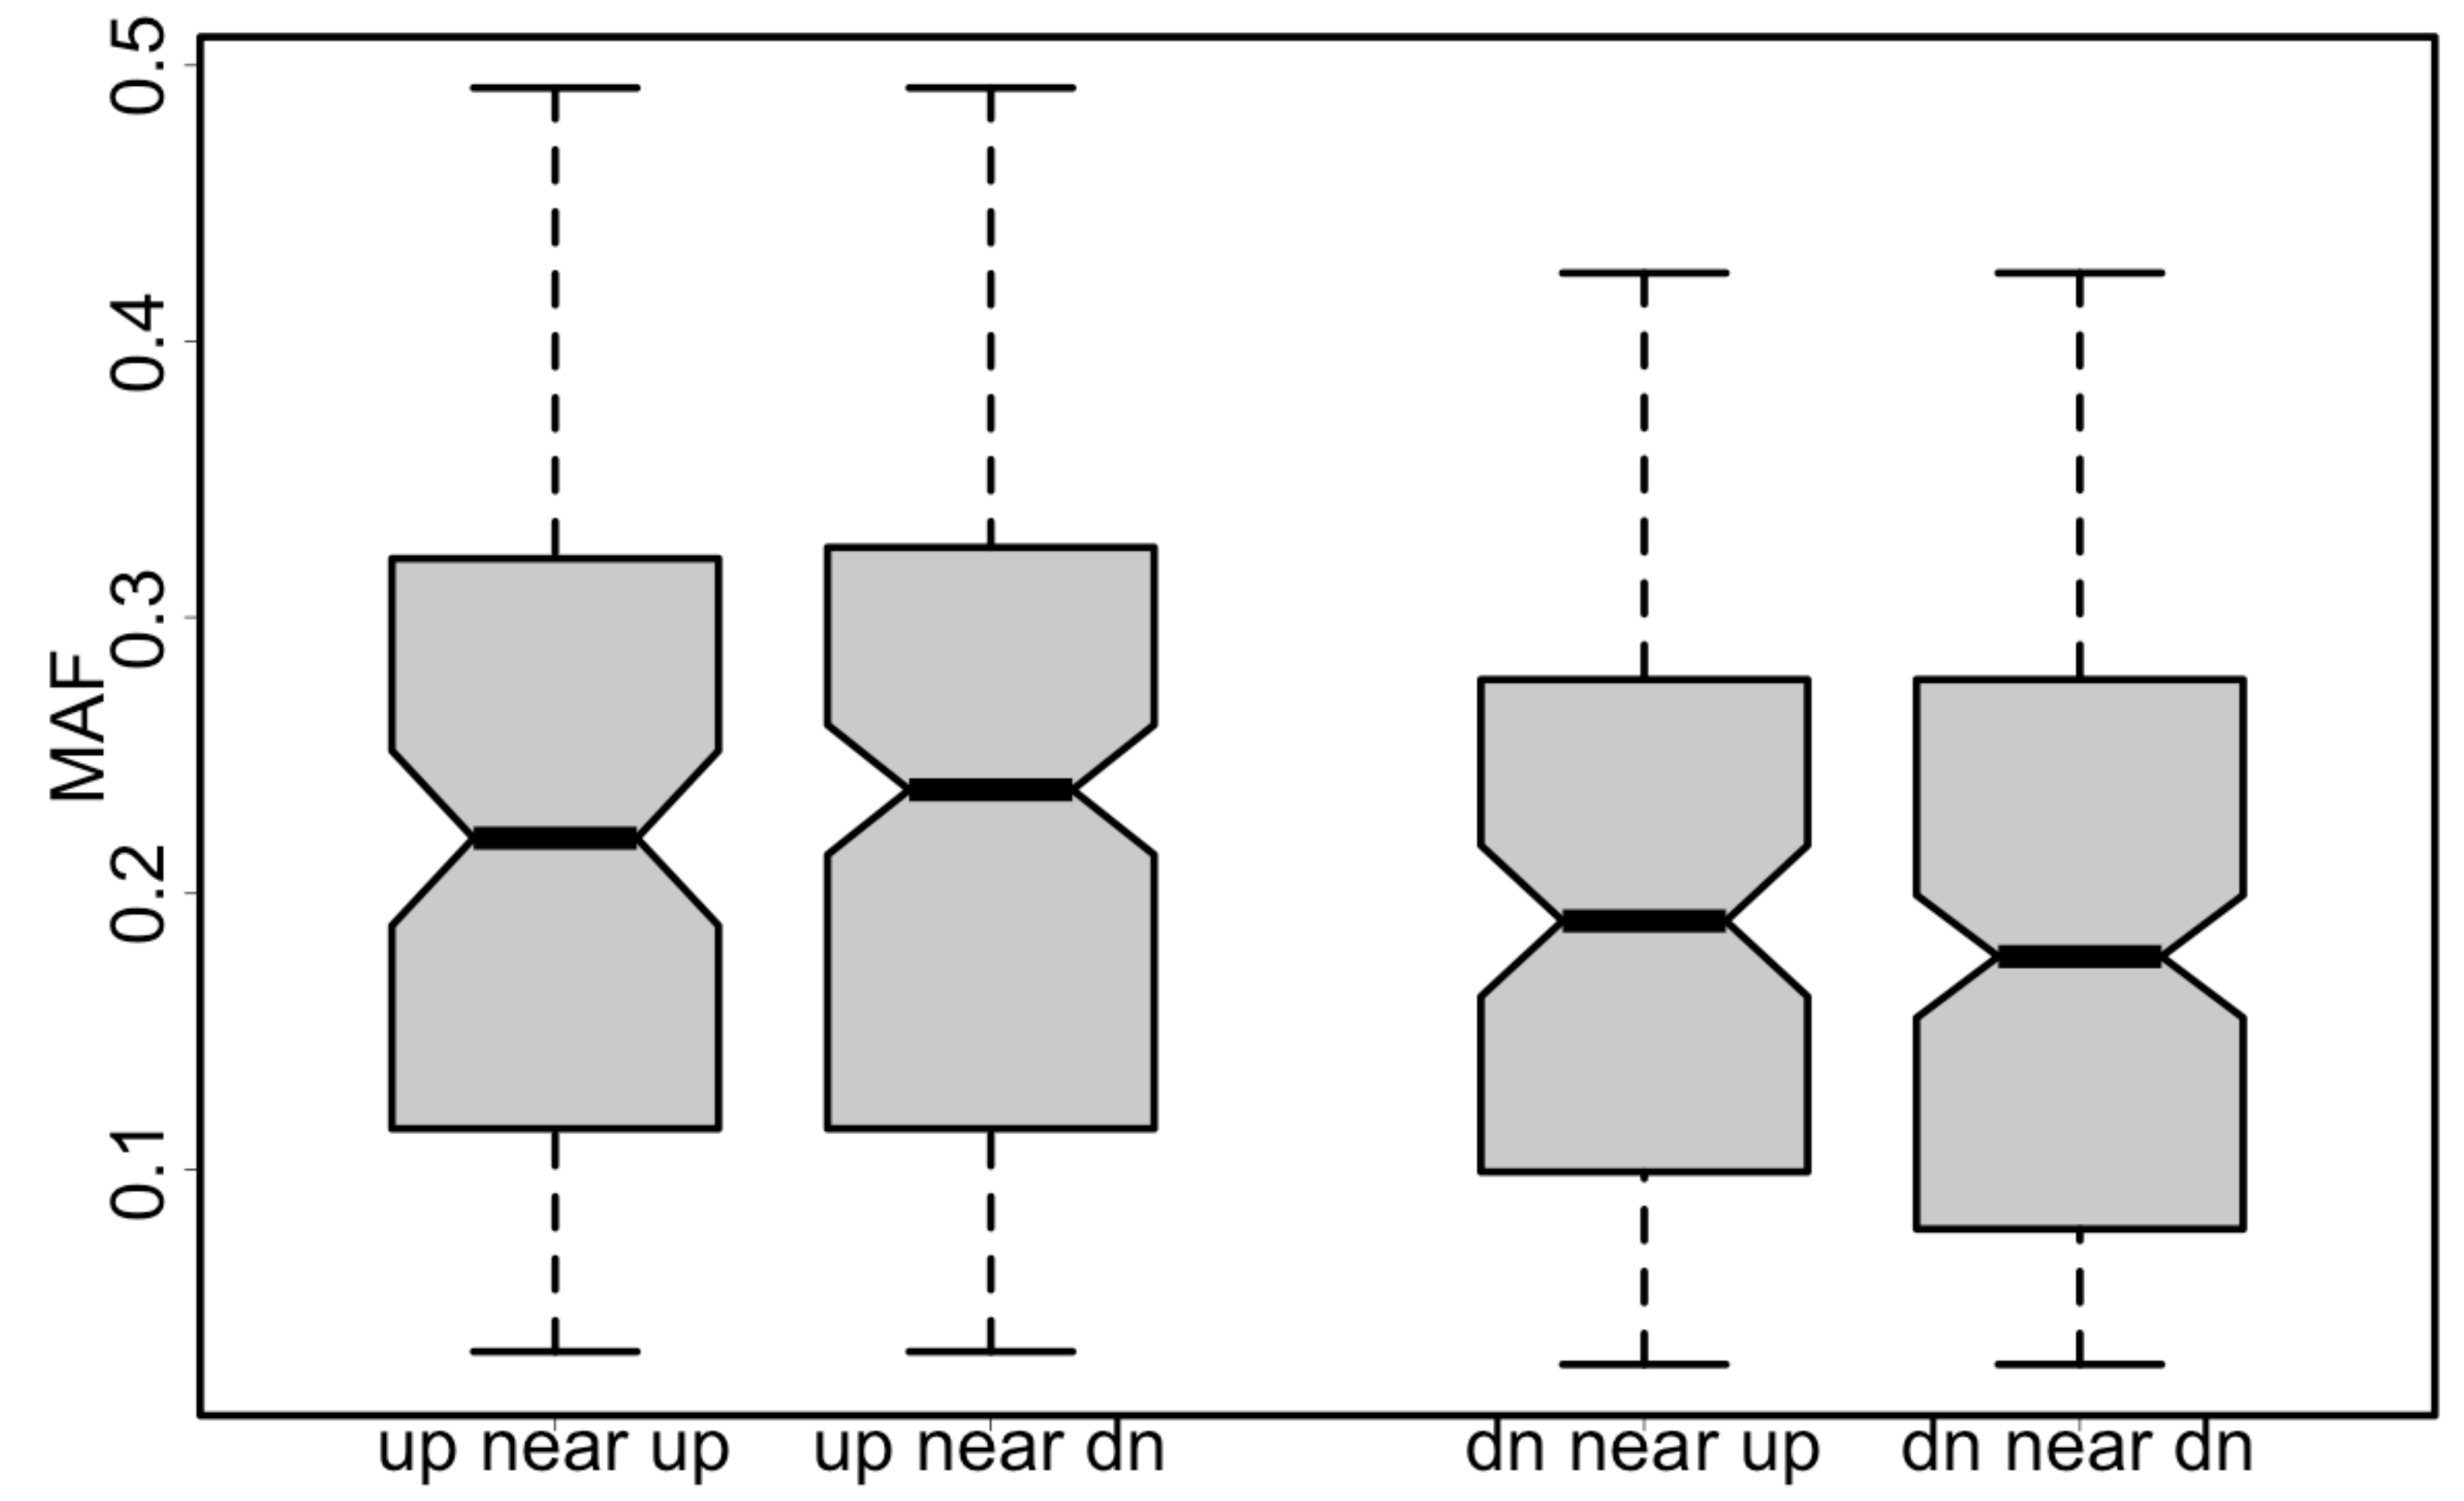

Figure S8
